# Supplementary material for: Macrophages protect mycoplasma‐infected chronic myeloid leukemia cells from natural killer cell killing
Source: PubMed Central journal article supplement — Immunol Cell Biol. 2020 Jan 13;98(2):138–51. doi: 10.1111/imcb.12309 (PMC7027758; doi:10.1111/imcb.12309), 2020-01-13
Supplement: IMCB-98-138-s001.pdf [file IMCB-98-138-s001.pdf]

## SUPPORTING INFORMATION

### Macrophage protects mycoplasma-infected chronic myeloid leukaemia cells from NK cell killing

Choo *et al.*

#### Supplementary Methods

---

##### Treatment of CML cells with poly(I:C) or lipopolysaccharide (LPS)

K562 CML cells were seeded at a density of 1 million cells per mL and treated with 10 or 100 ng mL<sup>-1</sup> LPS (Sigma-Aldrich, St Louis, USA, *E. coli*, O55:B5) for 4 or 16 hours, or with 10 µg mL<sup>-1</sup> poly(I:C) for 24 hours, according to established protocols<sup>1-3</sup>. The treated cells were seeded at 0.4 million cells per mL for determination of IL-8 production, to serve as an indicator of successful stimulation with LPS or poly(I:C).

##### Neutralisation of TIMP-1, TGFβ and IL-8

To determine the effect of TIMP-1, TGFβ and IL-8 on CML survival under trio-cultures of Mφ, NK and CML, neutralising antibodies against TIMP-1 (10 µg mL<sup>-1</sup>, polyclonal), TGFβ (10 µg mL<sup>-1</sup>, clone # 9016) or IL-8 (various concentration as stated in the figure, clone # 6217) were added to the cultures. For TIMP-1 and TGFβ1 neutralising antibodies, the optimal concentration was employed for experiment after testing a range of concentrations of neutralising antibodies (0.3, 1, 5, 10 and 20 µg mL<sup>-1</sup>). All neutralising antibodies and corresponding isotype controls were from R&D Inc, Minneapolis, USA (Supplementary Table 2).

##### Measurement of phosphorylated CD3ζ by flow cytometry

Following co-culture (of CML, Mφ and NK), to capture the level of CD3ζ phosphorylation (anti-pY142-CD3ζ, Becton Dickinson, Franklin Lakes, USA) in NK cells, the cells were fixed for 7 minutes with 0.4% paraformaldehyde (PFA) at room temperature, before staining with fixable viability dye to distinguish dead cells and debris. The cells were then fixed again with 4% PFA for 7 minutes at room temperature, and subsequently permeabilised with ice-cold 100% methanol for 10 minutes on ice. After Fc receptor blocking, the cells were stained with anti-CD14-APC (to distinguish Mφ from NK and CML), and anti-pY142-CD3ζ-PE primary conjugated antibody before acquisition of fluorescence signals by flow cytometry. Level of phosphorylation of CD3ζ was determined based on fold change in median fluorescence intensity (MFI).

1

1. Ngkelo A, Meja K, Yeadon M, Adcock I, Kirkham PA. LPS induced inflammatory responses in human peripheral blood mononuclear cells is mediated through NOX4 and Gialpha dependent PI-3kinase signalling. *Journal of inflammation (London, England)* 2012; **9**: 1.
2. Shi H, Guo Y, Liu Y, *et al.* The *in vitro* effect of lipopolysaccharide on proliferation, inflammatory factors and antioxidant enzyme activity in bovine mammary epithelial cells. *Animal nutrition (Zhongguo xu mu shou yi xue hui)* 2016; **2**: 99-104.
3. Suet Ting Tan R, Lin B, Liu Q, *et al.* The synergy in cytokine production through MyD88-TRIF pathways is co-ordinated with ERK phosphorylation in macrophages. *Immunology and cell biology* 2013; **91**: 377-87.

## Supplementary Tables

**Supplementary table 1. Primer sequences used for general detection of mycoplasma and specific species using polymerase chain reaction.**

| Name                          | Sequence (5' to 3')                                                                                                                                                                                                                                               | Amplicon size | Citation |
|-------------------------------|-------------------------------------------------------------------------------------------------------------------------------------------------------------------------------------------------------------------------------------------------------------------|---------------|----------|
| General mycoplasma detection  | (F1) CGCCTGAGTAGTACGTTCCG<br>(F2) CGCCTGAGTAGTACGTACGC<br>(F3) TGCCTGAGTAGTACATTCCG<br>(F4) TGCCTGGGTAGTACATTCCG<br>(F5) CGCCTGGGTAGTACATTCCG<br>(F6) CGCCTGAGTAGTATGCTCCG<br>(R1) GCGGTGTGTACAAGACCCGA<br>(R2) GCGGTGTGTACAAAACCCGA<br>(R3) GCGGTGTGTACAAAACCCGA | 500           | Ref. 1   |
| <i>Mycoplasma bovis</i>       | (F) TCGTCCGCTGATGCAAGTGC<br>(R) CGTCCGCTGACCTCAAGAA                                                                                                                                                                                                               | 499           | Ref. 2   |
| <i>Mycoplasma arginini</i>    | (F) GATTCCGTTGTGAAAGGAGC<br>(R) TCAAGCTTTCGCTC ATTGTG                                                                                                                                                                                                             | 202           | Ref. 3   |
| <i>Mycoplasma fermentans</i>  | (F) GGACTATTGTCTAAACAATTTCCC<br>(R) GGTTATTTCGATTTCTAAATCGCCT                                                                                                                                                                                                     | 206           | Ref. 4   |
| <i>Mycoplasma hominis</i>     | (F) ATACATGCATGTGAGCGAG<br>(R) CATCTTTTAGTGGCGCCTTAC                                                                                                                                                                                                              | 170           | Ref. 4   |
| <i>Mycoplasma hyorhinitis</i> | (F) GATGTAGCAATACATTCAGTAGC<br>(R) AAGTGAAGCTGTGAAGCTC                                                                                                                                                                                                            | 150           | Ref. 5   |
| <i>Mycoplasma orale</i>       | (F) TAATCCTGTTTGCTCCCCAC<br>(R) GGAGCGTTTCGTCCGCTAAG                                                                                                                                                                                                              | 583           | Ref. 6   |
| <i>Acholeplasma laidlawii</i> | (F) GATGAGAATAAGTGTGGCCATAA<br>(R) CGCTAGAGTCCCCAACTTAATGA                                                                                                                                                                                                        | 328           | Ref. 7   |

1. Uphoff CC, Drexler HG. Comparative PCR analysis for detection of mycoplasma infections in continuous cell lines. *In Vitro Cell Dev Biol Anim* 2002; **38**: 79-85.
2. Rodriguez JG, Mejia GA, Del Portillo P, Patarroyo ME, Murillo LA. Species-specific identification of *Mycobacterium bovis* by PCR. *Microbiology* 1995; **141**: 2131-8.
3. Lee DS, Yi TG, Lee HJ, et al. Mesenchymal stem cells infected with *Mycoplasma arginini* secrete complement C3 to regulate immunoglobulin production in B lymphocytes. *Cell death & disease* 2014; **5**: e1192.
4. Choppa PC, Vojdani A, Tagle C, Andrin R, Magtoto L. Multiplex PCR for the detection of *Mycoplasma fermentans*, *M. hominis* and *M. penetrans* in cell cultures and blood samples of patients with chronic fatigue syndrome. *Mol Cell Probes* 1998; **12**: 301-8.
5. Clavijo MJ, Oliveira S, Zimmerman J, Rendahl A, Rovira A. Field evaluation of a quantitative polymerase chain reaction assay for *Mycoplasma hyorhinitis*. *Journal of veterinary diagnostic investigation* 2014; **26**: 755-60.
6. Timenetsky J, Santos LM, Buzinhani M, Mettifogo E. Detection of multiple mycoplasma infection in cell cultures by PCR. *Brazilian journal of medical and biological research* 2006; **39**: 907-14.
7. Molla Kazemiha V, Shokrgozar MA, Arabestani MR, et al. PCR-based detection and eradication of mycoplasma infections from various mammalian cell lines: a local experience. *Cytotechnology* 2009; **61**: 117-124.

**Supplementary table 2. List of primary antibodies used.**

| <b>Antigen</b>                      | <b>Fluorescence</b> | <b>Clone</b>                       | <b>Company</b>                         |
|-------------------------------------|---------------------|------------------------------------|----------------------------------------|
| <b>Polychromatic flow cytometry</b> |                     |                                    |                                        |
| CD45                                | APC-Cy7             | 2D1                                | BioLegend, San Diego, USA              |
| CD3                                 | FITC                | OKT3                               | BioLegend, San Diego, USA              |
| CD19                                | FITC                | HIB19                              | BioLegend, San Diego, USA              |
| CD34                                | PE                  | 561                                | BioLegend, San Diego, USA              |
| CD117                               | BV421               | 104D2                              | BioLegend, San Diego, USA              |
| 25F9                                | eFluor 660          | eBio25F9                           | Thermo Fisher Scientific, Waltham, USA |
| CD56                                | PerCP-eFluor® 710   | CMSSB                              | Thermo Fisher Scientific, Waltham, USA |
| CD14                                | APC                 | 61D3                               | Thermo Fisher Scientific, Waltham, USA |
| CD14                                | BV605               | M5E2                               | BioLegend, San Diego, USA              |
| TIMP-1                              | PE                  | 63515                              | R&D Inc, Minneapolis, USA              |
| NKp46                               | PE/Dazzle594        | 9E2                                | BioLegend, San Diego, USA              |
| CD16                                | PE                  | B73.1                              | Thermo Fisher Scientific, Waltham, USA |
| CD16                                | BV650               | 3G8                                | BioLegend, San Diego, USA              |
| CD62L                               | PE/Dazzle™ 594      | DREG-56                            | BioLegend, San Diego, USA              |
| CD107a                              | PE                  | eBioH4A3                           | Thermo Fisher Scientific, Waltham, USA |
| IFN $\gamma$                        | eFluor® 450         | 4S.B3                              | Thermo Fisher Scientific, Waltham, USA |
| TNF $\alpha$                        | APC-Cy7             | MAb11                              | BioLegend, San Diego, USA              |
| MIP-1 $\alpha$                      | PE                  | CR3M                               | Thermo Fisher Scientific, Waltham, USA |
| <b>Neutralising antibodies</b>      |                     |                                    |                                        |
| TIMP-1                              | -                   | Goat polyclonal                    | R&D Inc, Minneapolis, USA              |
| TGF $\beta$                         | -                   | Mouse IgG1 monoclonal, clone #9016 | R&D Inc, Minneapolis, USA              |
| IL-8                                | -                   | Mouse IgG1 monoclonal, clone #6217 | R&D Inc, Minneapolis, USA              |
| Goat IgG                            | -                   | -                                  | R&D Inc, Minneapolis, USA              |
| Mouse IgG1                          | -                   | Clone #11711                       | R&D Inc, Minneapolis, USA              |

Supplementary table 3. Fold-change in sCD16 and mCD16 in NK and M $\phi$  in duo- and trio-cultures.

|                          | NK (fold change) <sup>a</sup>                                                       |                        |                      | M $\phi$ (fold change) <sup>b</sup>                                                  |         |                      |
|--------------------------|-------------------------------------------------------------------------------------|------------------------|----------------------|--------------------------------------------------------------------------------------|---------|----------------------|
|                          | NC / N                                                                              | MNC / N                | MN / N               | MC / M                                                                               | MNC / M | MN / M               |
| <b>sCD16</b>             | ↑ 3.12                                                                              | ↑ 10.1                 | ↑ 3.16               | ↑ 4.14                                                                               | ↑ 9.93  | ↑ 3.11               |
| <b>mCD16</b>             | ↓ 3.95                                                                              | ↓ 1.18<br>(maintained) | 1.06<br>(maintained) | ↑ 6.64                                                                               | ↑ 5.38  | 1.04<br>(maintained) |
| <b>mCD16<sup>c</sup></b> |                                                                                     |                        |                      |                                                                                      |         |                      |
| <b>Experiment 1</b>      | 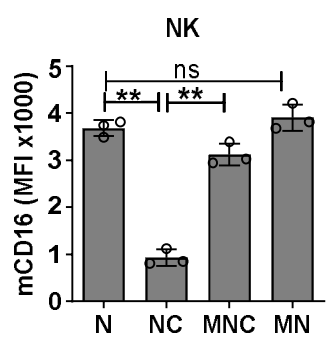   |                        |                      |    |         |                      |
| <b>Experiment 2</b>      |   |                        |                      |   |         |                      |
| <b>Experiment 3</b>      |  |                        |                      |  |         |                      |
| <b>Experiment 4</b>      |  |                        |                      |  |         |                      |

<sup>a,b</sup> Fold-change is derived through comparison of sCD16 concentration or mCD16 MFI with respect to NK or M $\phi$  alone culture. Fold-change < 1.2 was considered as no change, viz, the level of mCD16 was maintained.

<sup>c</sup>Data from each experiment are presented as mean  $\pm$  s.d. of 3 replicate cultures. 4 independent experiments, each from different donors are shown. For comparison between multiple groups, 1-way ANOVA was performed with Bonferroni post-hoc analysis. \* $P < 0.05$ , \*\* $P < 0.01$ , ns non-significant

Supplementary Figures

Experiment 1

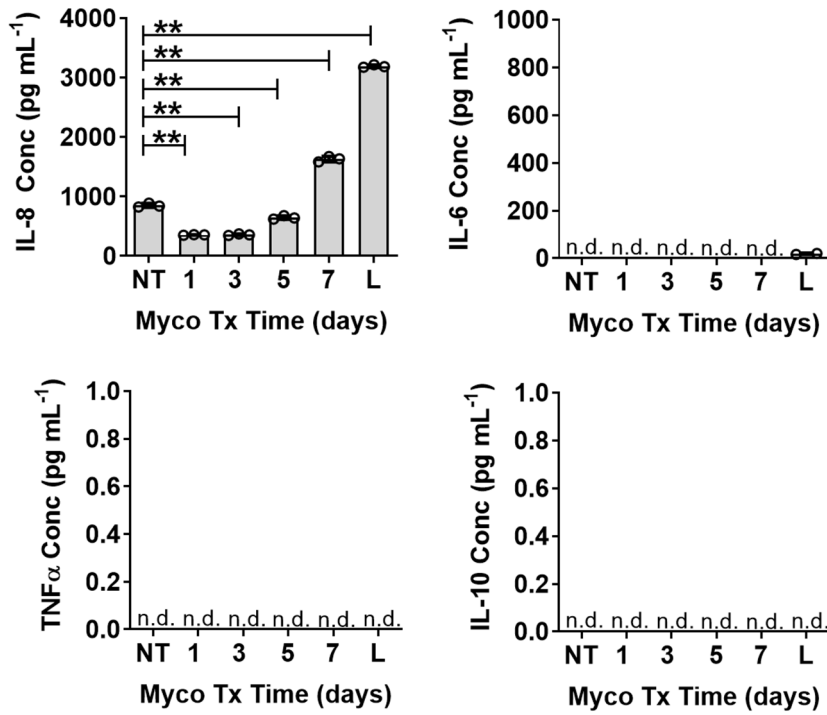

Experiment 2

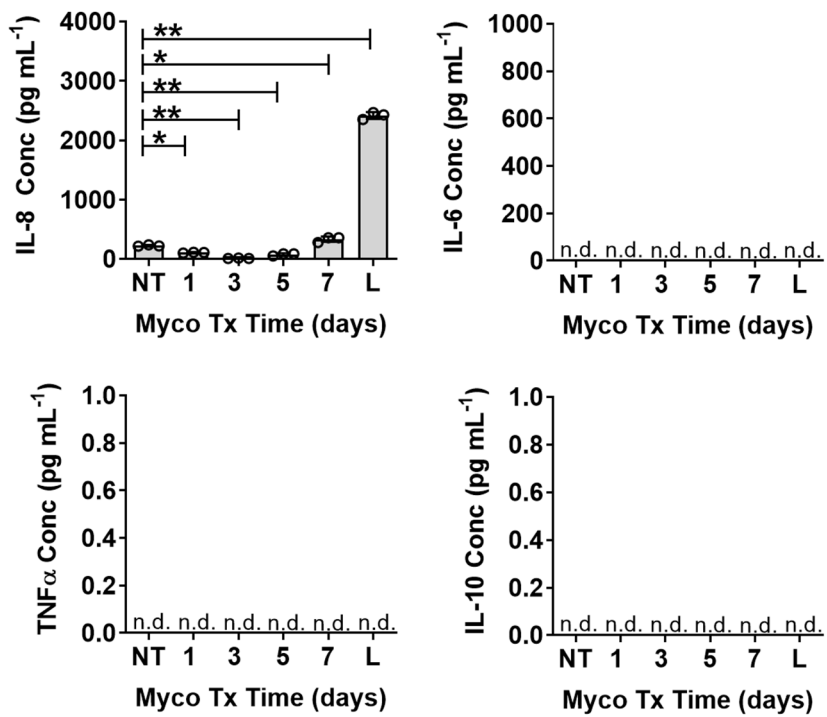

### Experiment 3

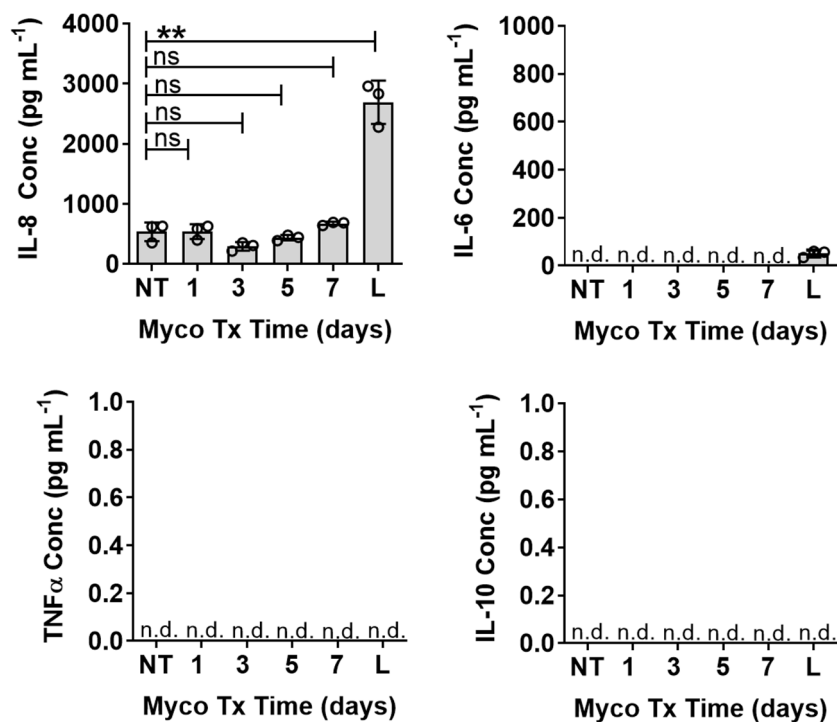

### Supplementary figure 1, related to Figure 1b. Increased production of IL-8 by CML with chronic and acute infection of mycoplasma.

Mycoplasma-infected K562 cells were seeded at 1 million cells per mL and incubated overnight. Culture supernatants were tested for presence of IL-8, IL-6, TNF $\alpha$  and IL-10 using ELISA. Data from each experiment are presented as mean  $\pm$  s.d. of 3 replicate cultures. 3 independent experiments, each from different donors are shown. Statistical significance was determined using 1-way ANOVA corrected with Bonferroni's Multiple Comparison Test. \* P < 0.05; \*\* P < 0.01; ns, non-significant.

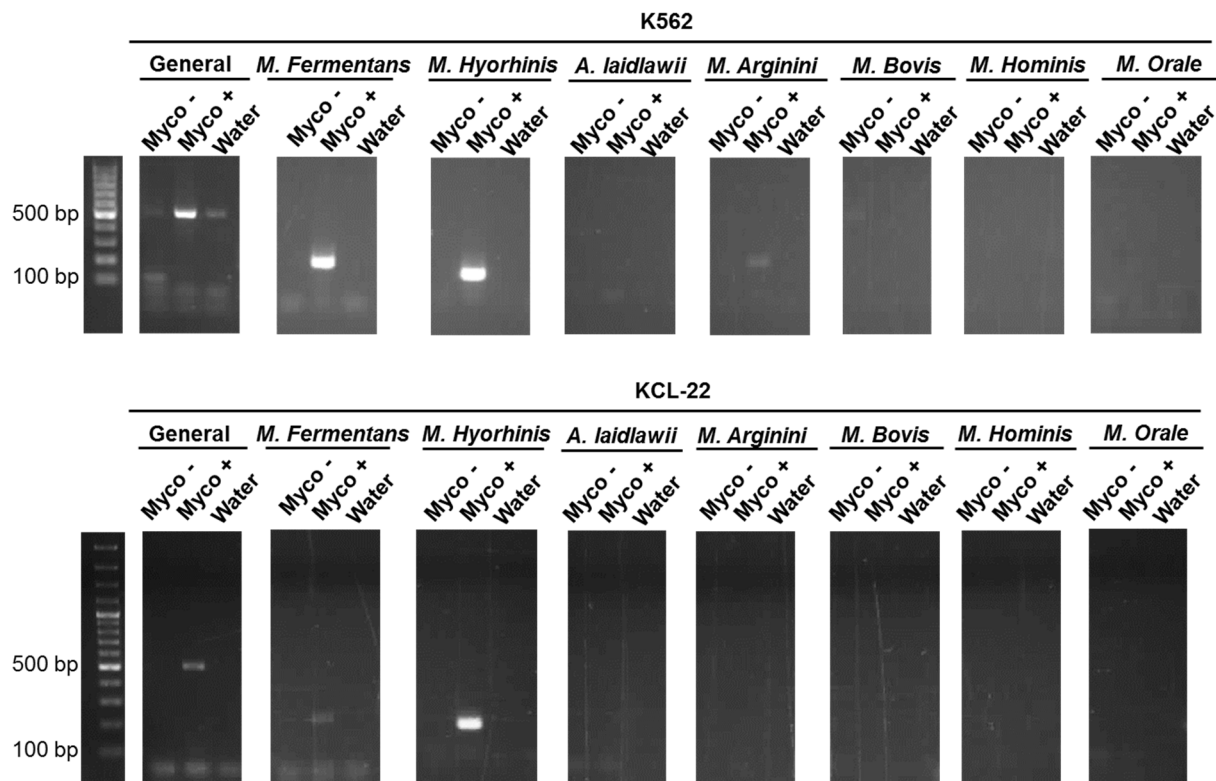

**Supplementary figure 2. *M. Fermentans* and *M. Hyorhinis* were consistently detected in mycoplasma-infected cultures of K562 and KCL-22.** Cell culture supernatants were tested for presence of mycoplasma (general) and the specific species of mycoplasma present via PCR. DNA bands were visualised via UV transillumination (Biorad imager and Syngene Genesnap software) of SYBR safe-stained agarose gel. Both K562 and KCL-22 cultures were mycoplasma-positive based on detection of the 500-bp band for general mycoplasma. Consistently, 206-bp band for *Mycoplasma fermentans* and 150-bp band for *Mycoplasma hyorhinis* were detected in cultures of K562 and KCL-22. Although a faint band for *Mycoplasma arginini* was detected, it was deemed non-specific as it was inconsistent for the three independent experiments performed.

(a)

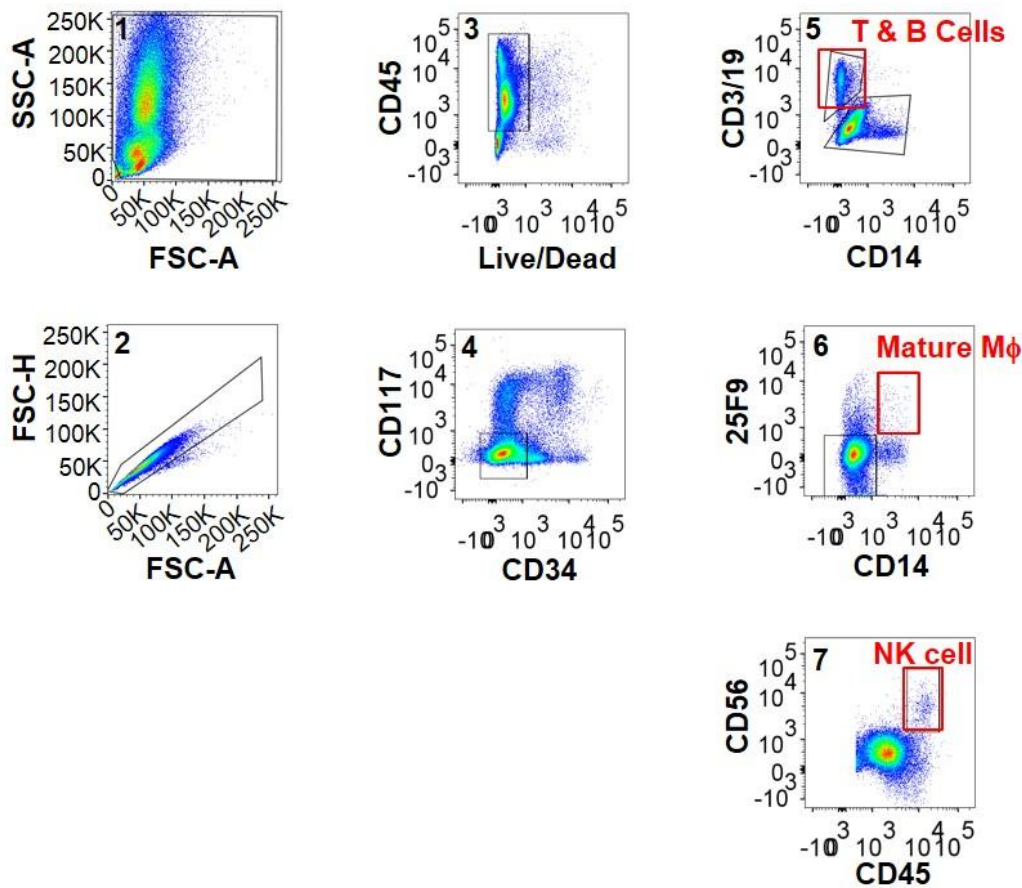

(b)

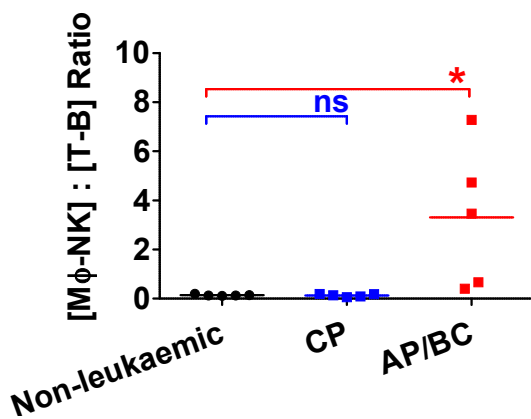

**Supplementary figure 3. Increase in the ratio of innate Mφ-NK to adaptive T-B cells in severe CML.**

(a) Representative flow cytometry dot plots showing flow cytometry gating strategy for delineating mature Mφ, NK, T and B cells from fresh/frozen CML and non-CML control samples. Sequential gating was used (from plots 1 to 7) for delineating mature monocytes/Mφ, NK, T and B cells. Mature Mφ was defined as CD45<sup>+</sup> CD34<sup>-</sup> CD117<sup>-</sup> CD3/19<sup>-</sup> CD14<sup>+</sup> and 25F9<sup>+</sup>. NK cell was defined as CD45<sup>+</sup> CD34<sup>-</sup> CD117<sup>-</sup> CD3/19<sup>-</sup> CD14<sup>-</sup> 25F9<sup>-</sup> CD56<sup>+</sup>. T and B cells were defined as CD45<sup>+</sup> CD34<sup>-</sup> CD117<sup>-</sup> CD3/19<sup>+</sup>. (b) Graphical representation of [Mφ-NK] : [T-B] ratio in CML stratified by staging. Non-leukaemia patients n=5; CP, chronic phase patients n=5; AP/BC, accelerated phase/blast crisis patients n=5. Statistical significance was determined using Kruskal-Wallis test with Dunns' post-hoc analysis. \*  $P < 0.05$ ; \*\*  $P < 0.01$ ; ns, non-significant.



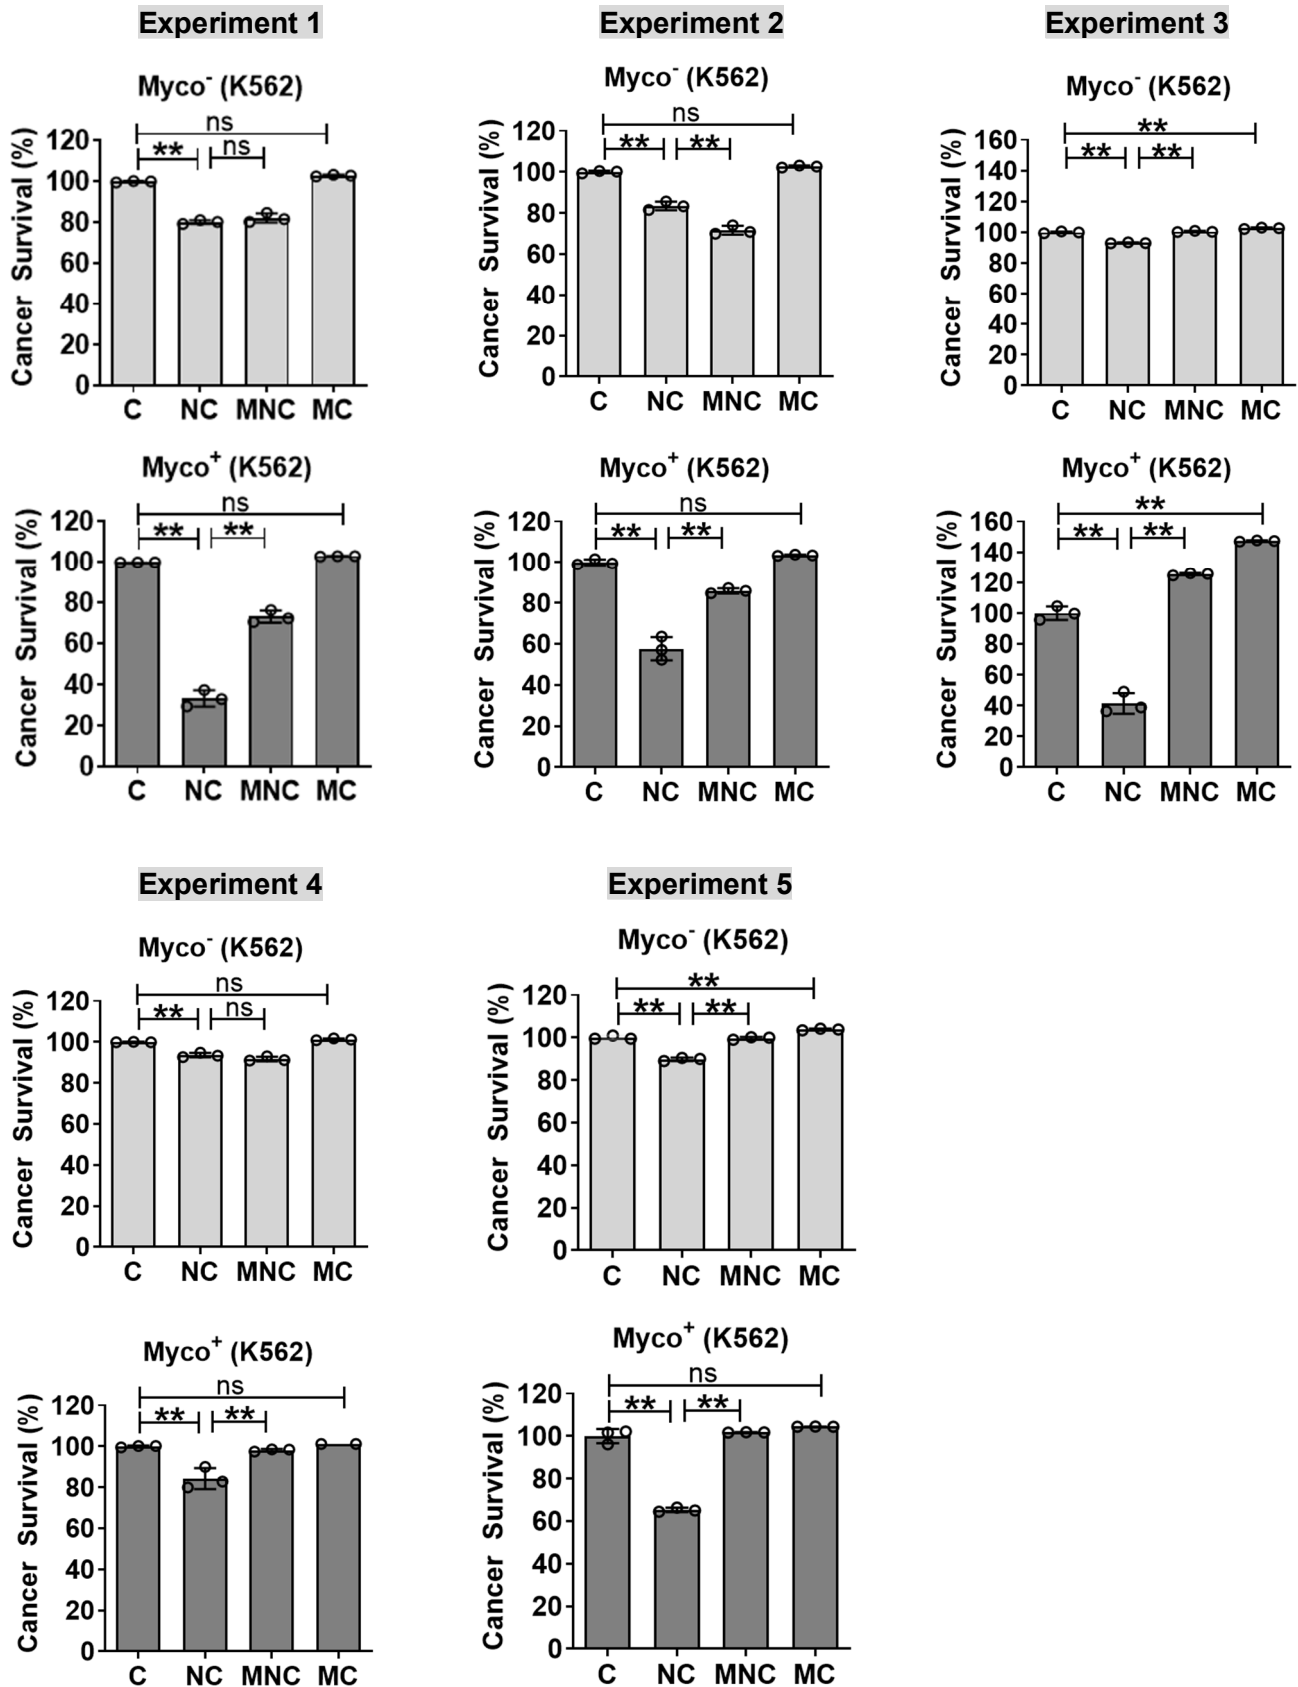

**Supplementary figure 4, related to Figure 2c. M $\phi$  attenuates NK cytotoxicity against mycoplasma-infected CML.**

CML survival measured under myco<sup>+</sup> and myco<sup>-</sup> conditions, upon co-culture with M $\phi$ , N and normalised to cancer alone control. Data from each experiment are presented as mean  $\pm$  s.d. of 2-3 replicate cultures. 5 independent experiments, each from different donors are shown. Statistical significance was determined using 1-way ANOVA corrected with Bonferroni's Multiple Comparison Test. \* P < 0.05; \*\* P < 0.01; ns, non-significant.

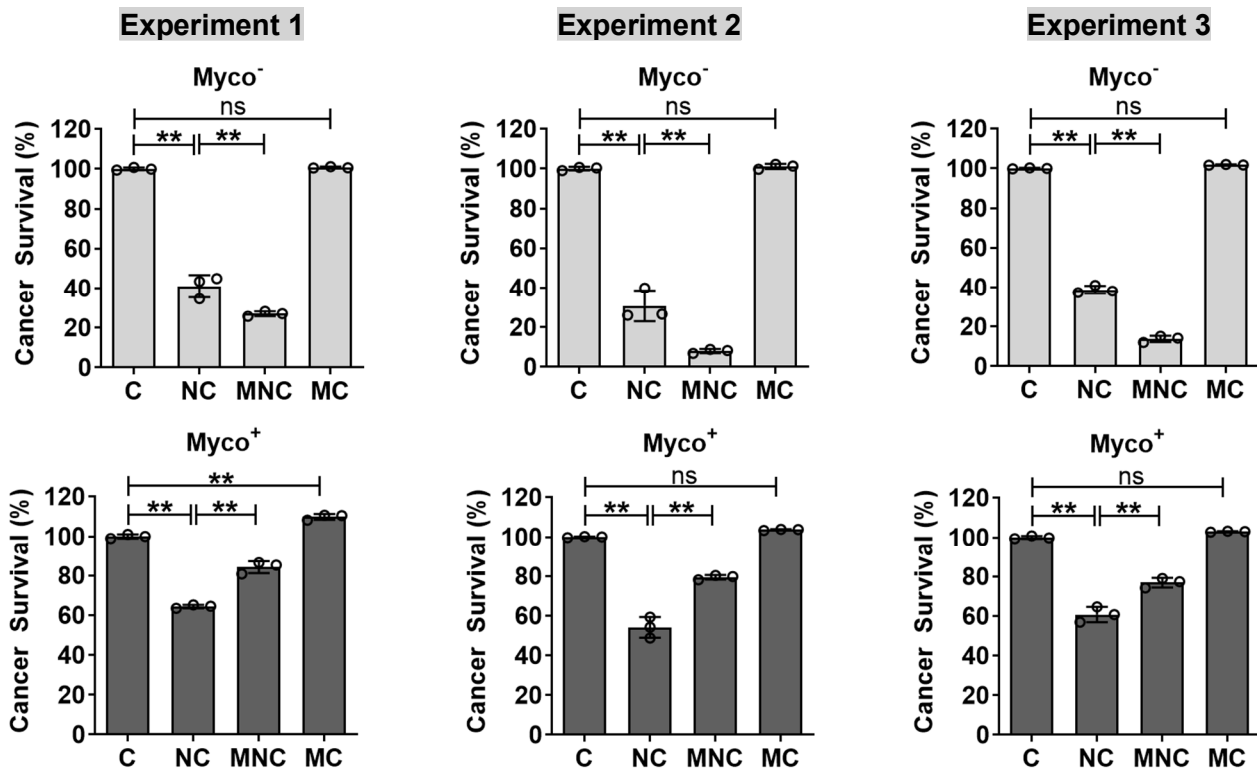

**Supplementary figure 5. M $\phi$  protection of CML against NK cytotoxicity under myco<sup>+</sup> condition was also observed for KCL-22 CML cells.** NK cell and M $\phi$  were co-cultured with myco<sup>+</sup>/myco<sup>-</sup> KCL-22. KCL-22 survival was measured based on negative staining for viability dye (FVD) and normalised to cancer alone control. Data from each experiment are presented as mean  $\pm$  s.d. of 3 replicate cultures. 3 independent experiments, each from different donors are shown. Statistical significance was determined using 1-way ANOVA corrected with Bonferroni's Multiple Comparison Test. \* $P < 0.05$ , \*\* $P < 0.01$ , ns, non-significant. C, CML alone; NC, NK+CML; MNC, M $\phi$ +NK+CML; MC, M $\phi$ +CML.

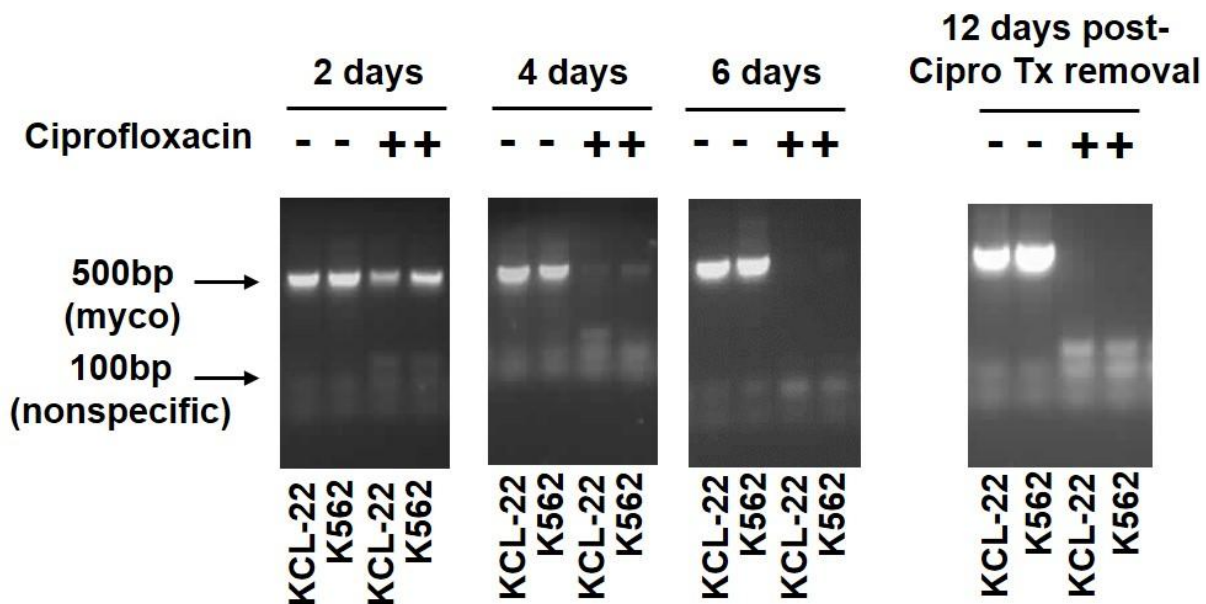

**Supplementary figure 6. Optimal ciprofloxacin treatment period of mycoplasma-infected CML culture was 6-days.** Myco<sup>+</sup> CML cells were treated with 10  $\mu\text{g mL}^{-1}$  ciprofloxacin for 2, 4 and 6 days of treatment. Culture supernatants from ciprofloxacin-treated CML cells were aliquoted for mycoplasma PCR test. Mycoplasma-infected culture was observed to be cleared of mycoplasma by 6-day ciprofloxacin treatment. There was no recurrence of mycoplasma infection 12 days post-ciprofloxacin treatment.

## Experiment 1

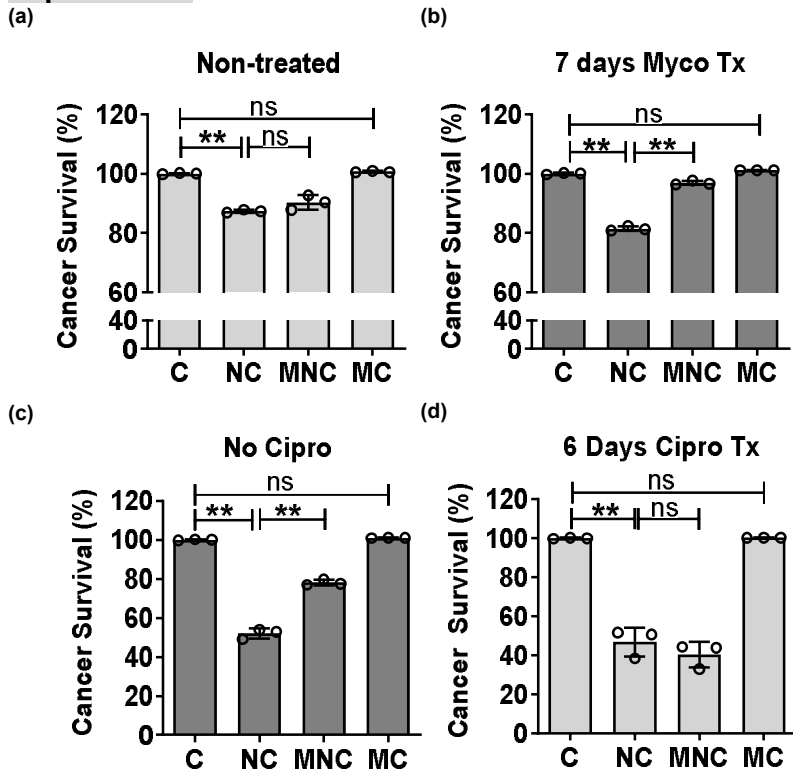

## Experiment 2

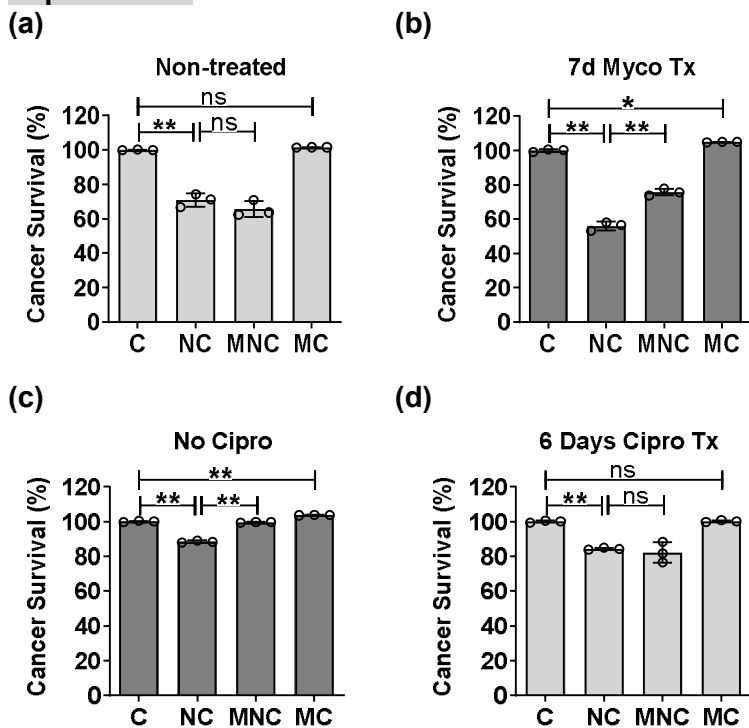

### Experiment 3

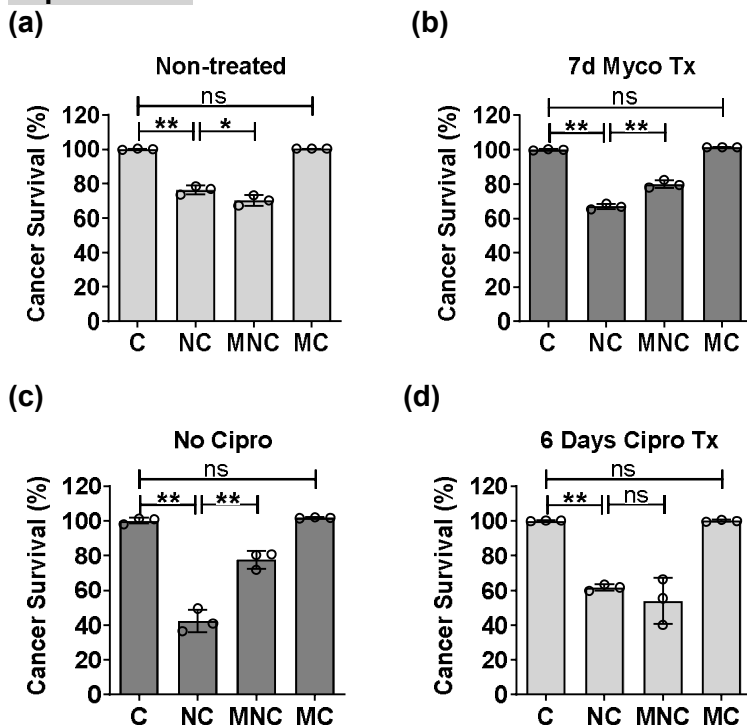

### Supplementary figure 7, related to Figure 3. M $\phi$ protection of CML is specific to infection-inflammation condition induced by mycoplasma.

NK and M $\phi$  were co-cultured with (a, b) non-infected CML treated with mycoplasma-containing medium or, (c, d) chronically-infected CML treated with 10  $\mu\text{g mL}^{-1}$  ciprofloxacin. CML survival was subsequently measured based on negative staining for viability dye (FVD) and normalised to cancer alone control. Data from each experiment are presented as mean  $\pm$  s.d. of 3 replicate cultures. 3 independent experiments, each from different donors are shown. Statistical significance was determined using 1-way ANOVA corrected with Bonferroni's Multiple Comparison Test. \*  $P < 0.05$ ; \*\*  $P < 0.01$ ; ns, non-significant.

(a)

10 or 100 ng/ml  
LPS

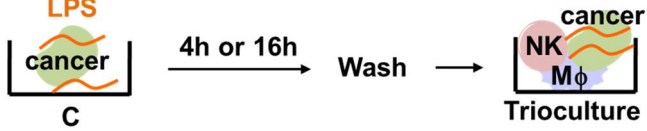

(b)

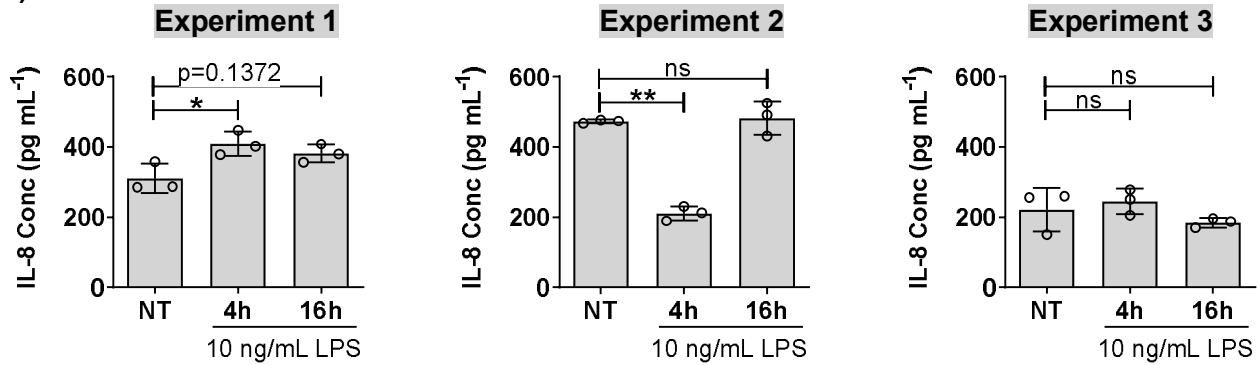

(c)

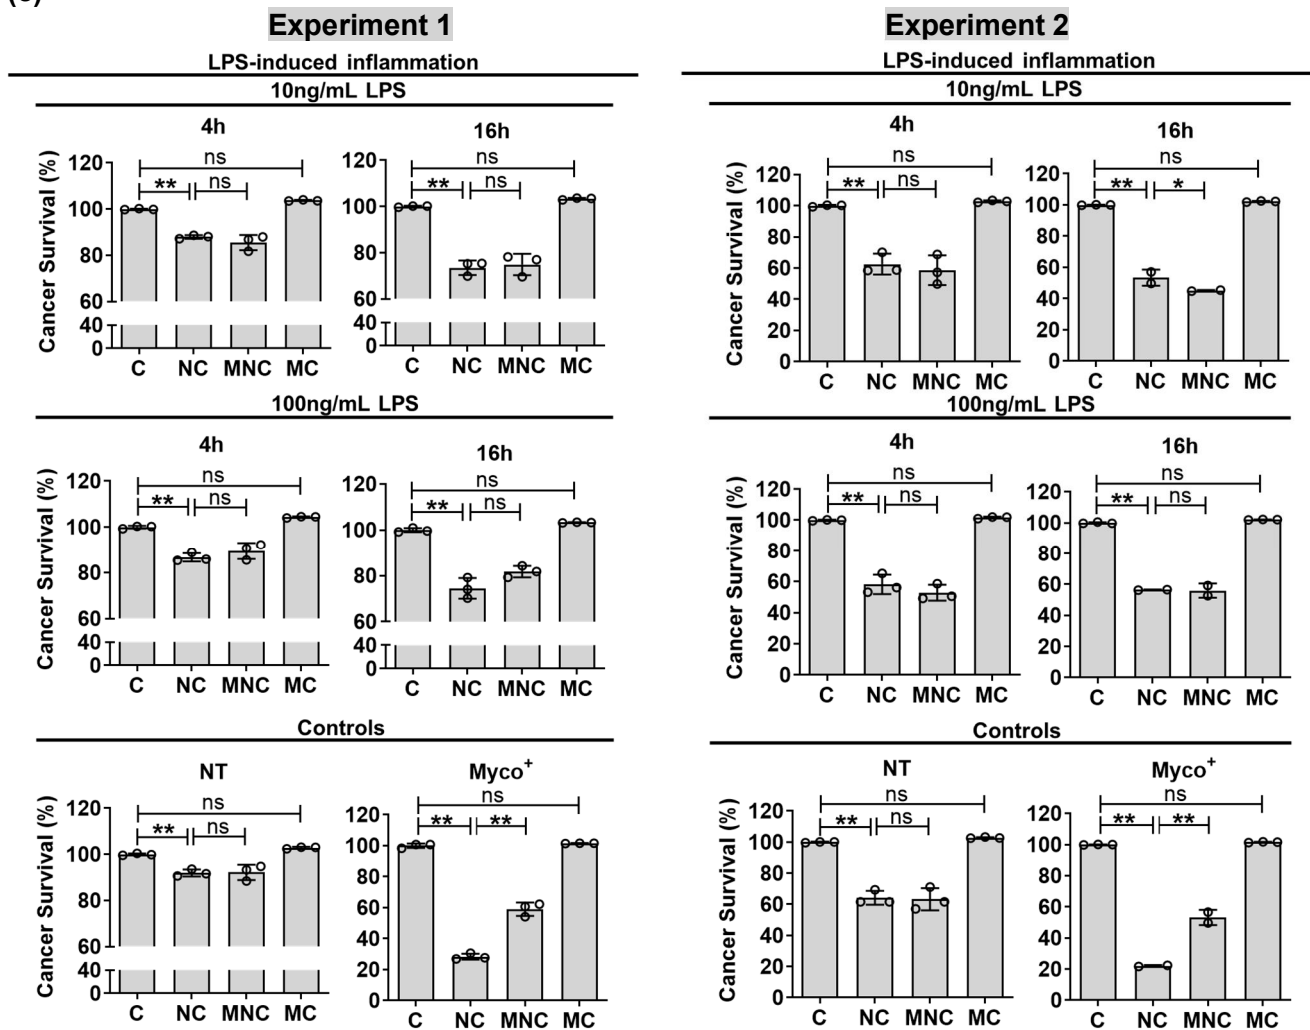

### Experiment 3

LPS-induced inflammation

10ng/mL LPS

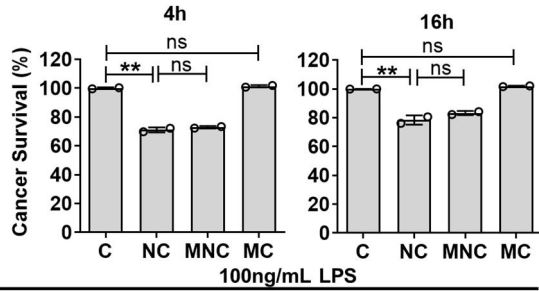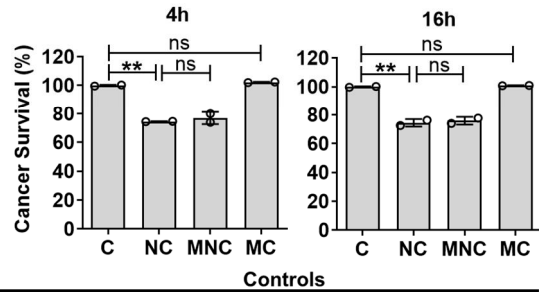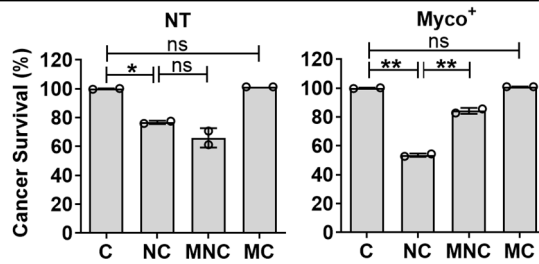

### Supplementary figure 8. LPS-induced infection-inflammation condition does not lead to macrophage protection of CML.

(a) Experimental set-up for LPS treatment of CML cells prior to Mφ, NK and CML trio-culture. Cells were treated for 4 or 16 hours with 10 or 100 ng mL<sup>-1</sup> LPS and washed prior to the trio-culture. (b) LPS-treated cells were seeded at a density of 0.4 million cells per mL. Culture media was measured for IL-8 production. (c) CML cell survival measured under each condition, with NT (not treated with LPS) as negative control and mycoplasma<sup>+</sup> (myco<sup>+</sup>) as positive control. CML survival was measured based on negative staining for FVD and normalised to cancer alone control. Data from each experiment are presented as mean ± s.d. from 2 – 3 replicate cultures. For (b and c), 3 independent experiments, each from different donors are shown. Statistical significance was determined using 1-way ANOVA corrected with Bonferroni's Multiple Comparison Test. \* *P* < 0.05, \*\* *P* < 0.01, ns non-significant. C, CML alone; NC, NK+CML; MNC, Mφ+NK+CML; MC, Mφ+CML.

(a)

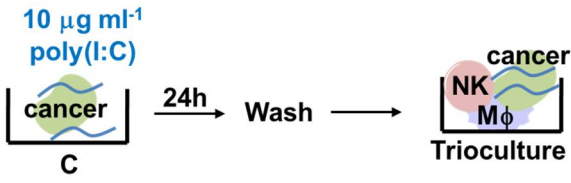

(b)

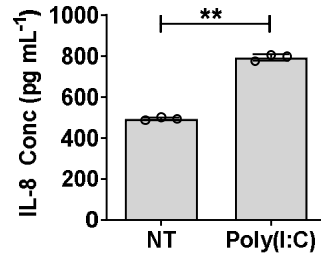

(c)

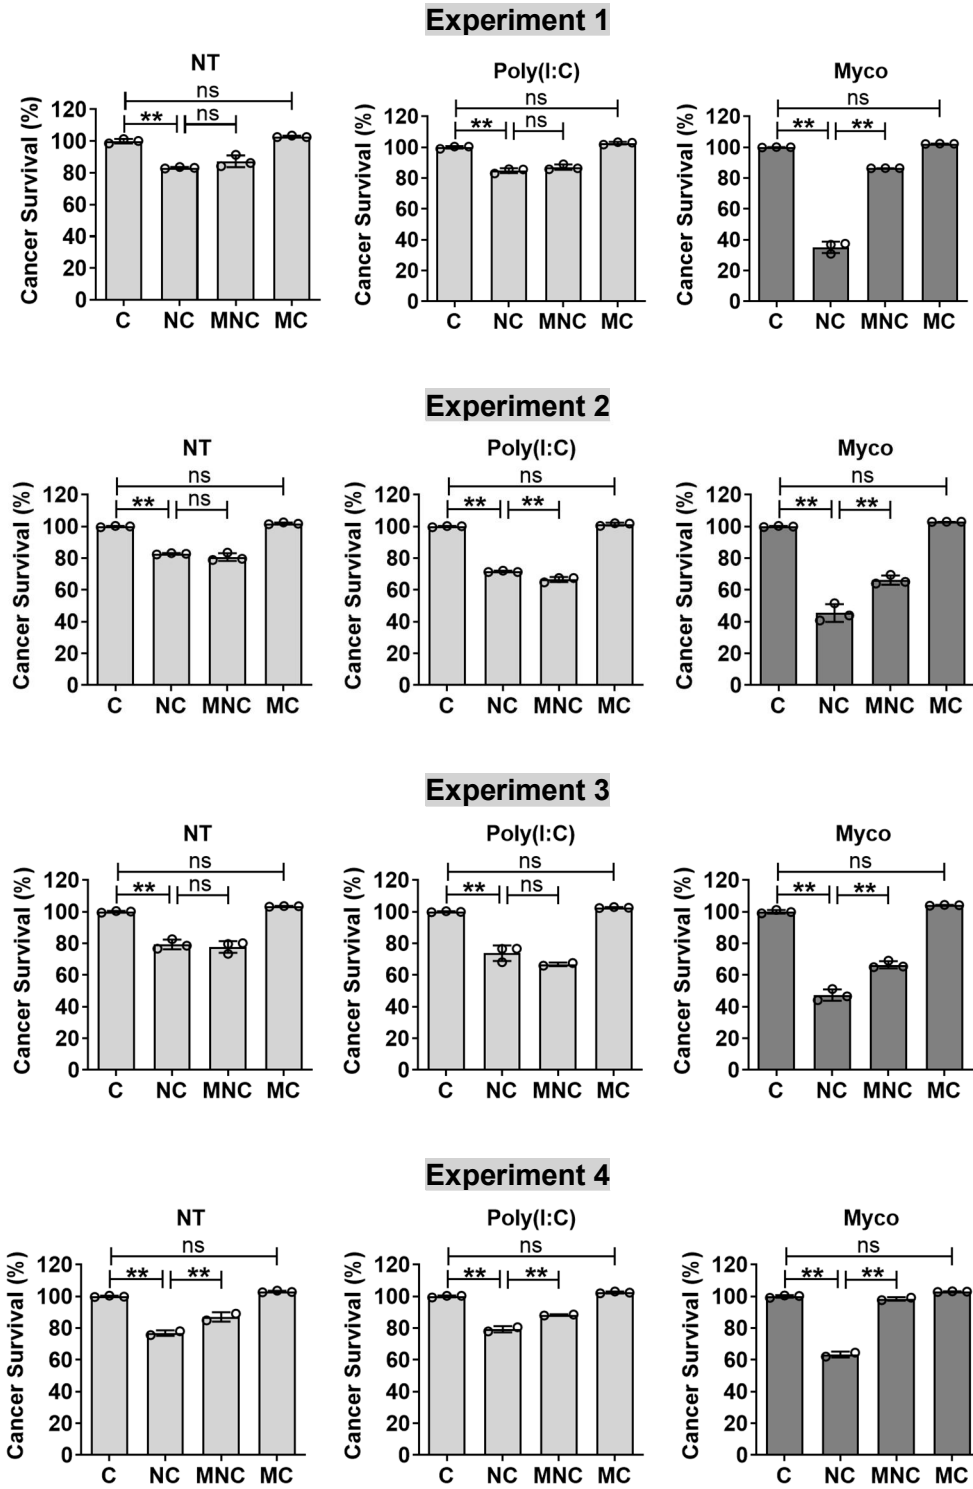

**Supplementary figure 9. Macrophages do not protect poly(I:C)-treated CML from NK cytotoxicity.** (a) Experimental set-up for polyinosinic-polycytidylic acid (poly(I:C)) treatment of CML cells prior to M $\phi$ , NK and CML trio-culture. Cells were treated for 24 hours with 10  $\mu\text{g mL}^{-1}$  poly and washed prior to the trio-culture. (b) Poly(I:C)-treated cells were seeded at a density of 1 million cells per mL. The culture media were tested for IL-8. (c) CML cell survival measured under each condition, with NT (not treated) as negative control and myco<sup>+</sup> as positive control. CML survival was measured based on negative staining for FVD and normalised to cancer alone control. Data from each experiment are presented as mean  $\pm$  s.d. from 2 – 3 replicate cultures. For (c), 4 independent experiments, each from different donors are shown. Statistical significance was determined using two-tailed Student's *t*-test in (b) and 1-way ANOVA corrected with Bonferroni's Multiple Comparison Test in (c). \**P* < 0.05, \*\**P* < 0.01, ns non-significant. C, CML alone; NC, NK+CML; MNC, M $\phi$ +NK+CML; MC, M $\phi$ +CML.



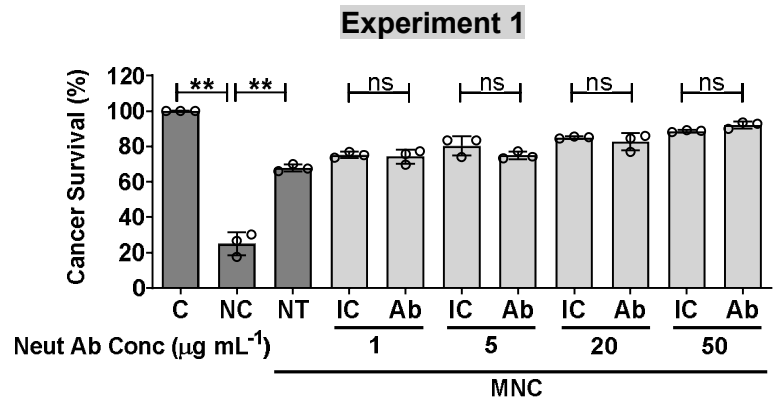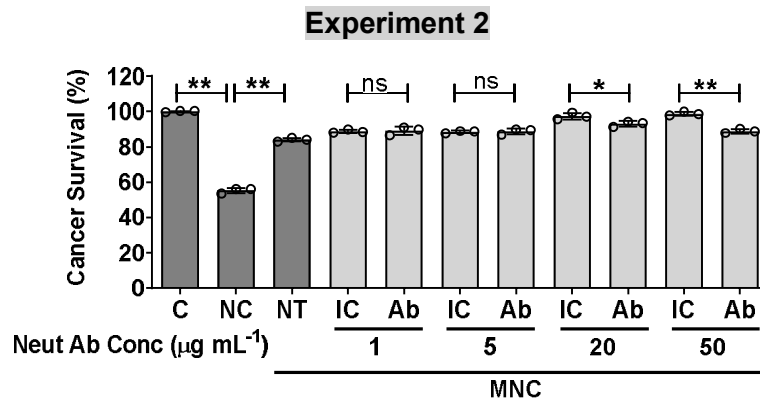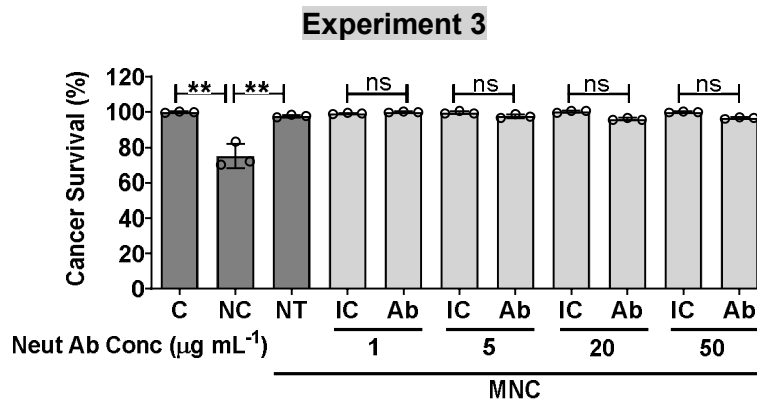

**Supplementary figure 10. Increasing dose of IL-8 neutralising antibodies (Ab) added to MNC trio-culture does not influence M $\phi$  protection of myco<sup>+</sup> CML from NK cytotoxicity.**

MNC trio-cultures were treated with neutralising antibodies against human IL-8 (Ab) and equal amount of mouse IgG1 isotype control in increasing doses, as indicated. The treated samples were then measured for CML survival based on negative staining for FVD. Data from each experiment are presented as mean  $\pm$  s.d. from 3 replicate cultures. 3 independent experiments, each from different donors are shown. Statistical significance was determined using 1-way ANOVA corrected with Bonferroni's Multiple Comparison Test. \*  $P < 0.05$ ; \*\*  $P < 0.01$ ; ns, non-significant; C – cancer alone; NC – NK + cancer ; NT - M $\phi$  + NK + cancer (MNC), without Ab treatment; IC – MNC treated with isotype control; Ab – MNC treated with anti-IL-8 antibody.

### Experiment 1

(a)

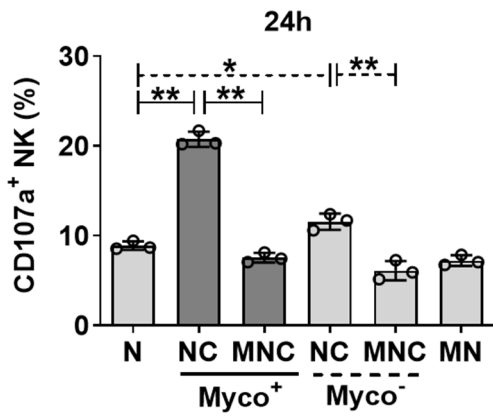

(b)

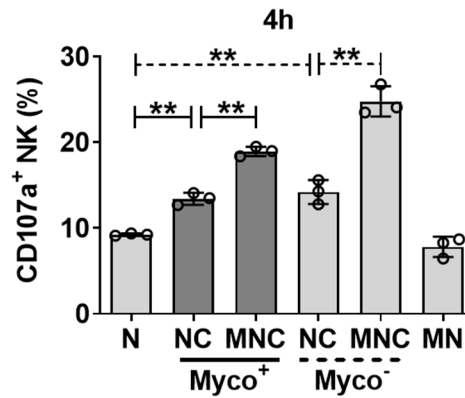

### Experiment 2

(a)

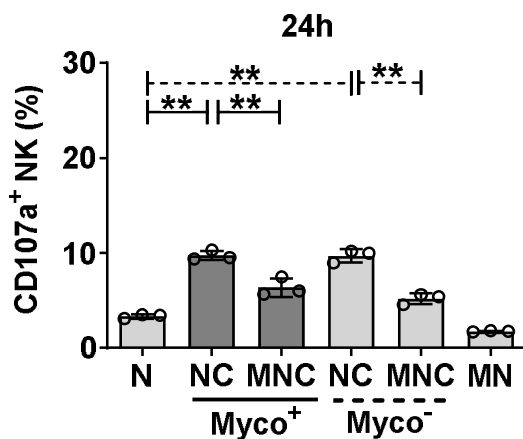

(b)

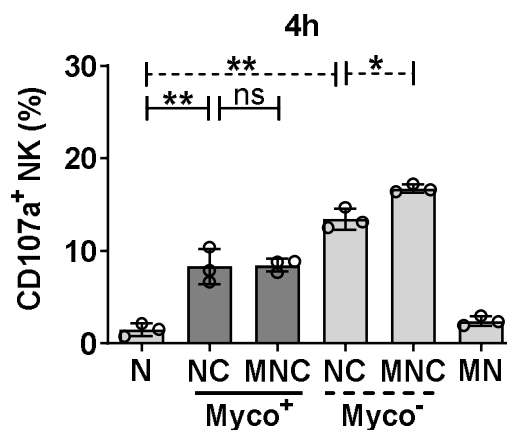

### Experiment 3

(a)

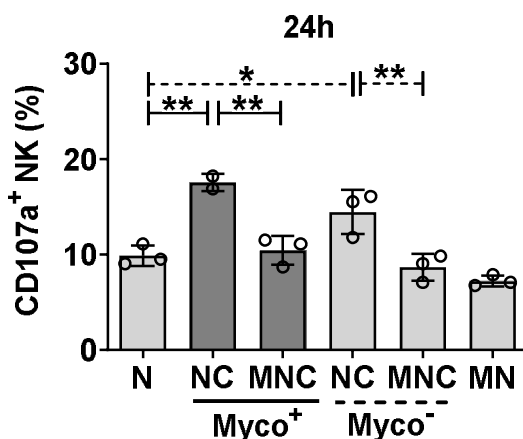

(b)

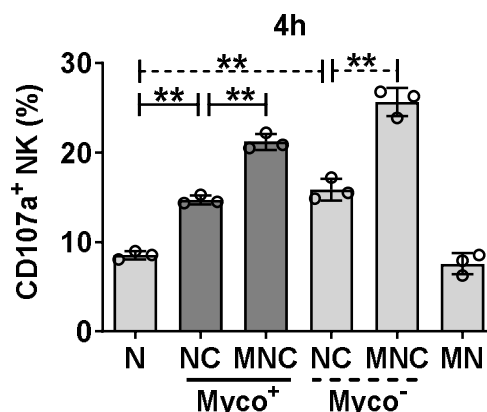

### Supplementary figure 11, related to Figure 4. M $\phi$ suppresses NK degranulation over time in MNC trio-culture.

M $\phi$ , and myco<sup>-</sup> and myco<sup>+</sup> CML were incubated in mono-, duo- and trio-cultures according to the experimental strategies outlined in (a) (24 hours) and (b) (4 hours). CFSE<sup>-</sup>CD14<sup>-</sup>CD56<sup>+</sup> NK were then gated and CD107a<sup>+</sup> NK were determined. Data from each experiment are presented as mean  $\pm$  s.d. of 3 replicate cultures. 3 independent experiments, each from different donors are shown. Each graph contains data from one of the independent experiments, presented as mean  $\pm$  s.d. Statistical significance was determined using 1-way ANOVA corrected with Bonferroni's Multiple Comparison Test, based on the technical replicates within the independent experiment presented. \* P < 0.05; \*\* P < 0.01; ns, non-significant.

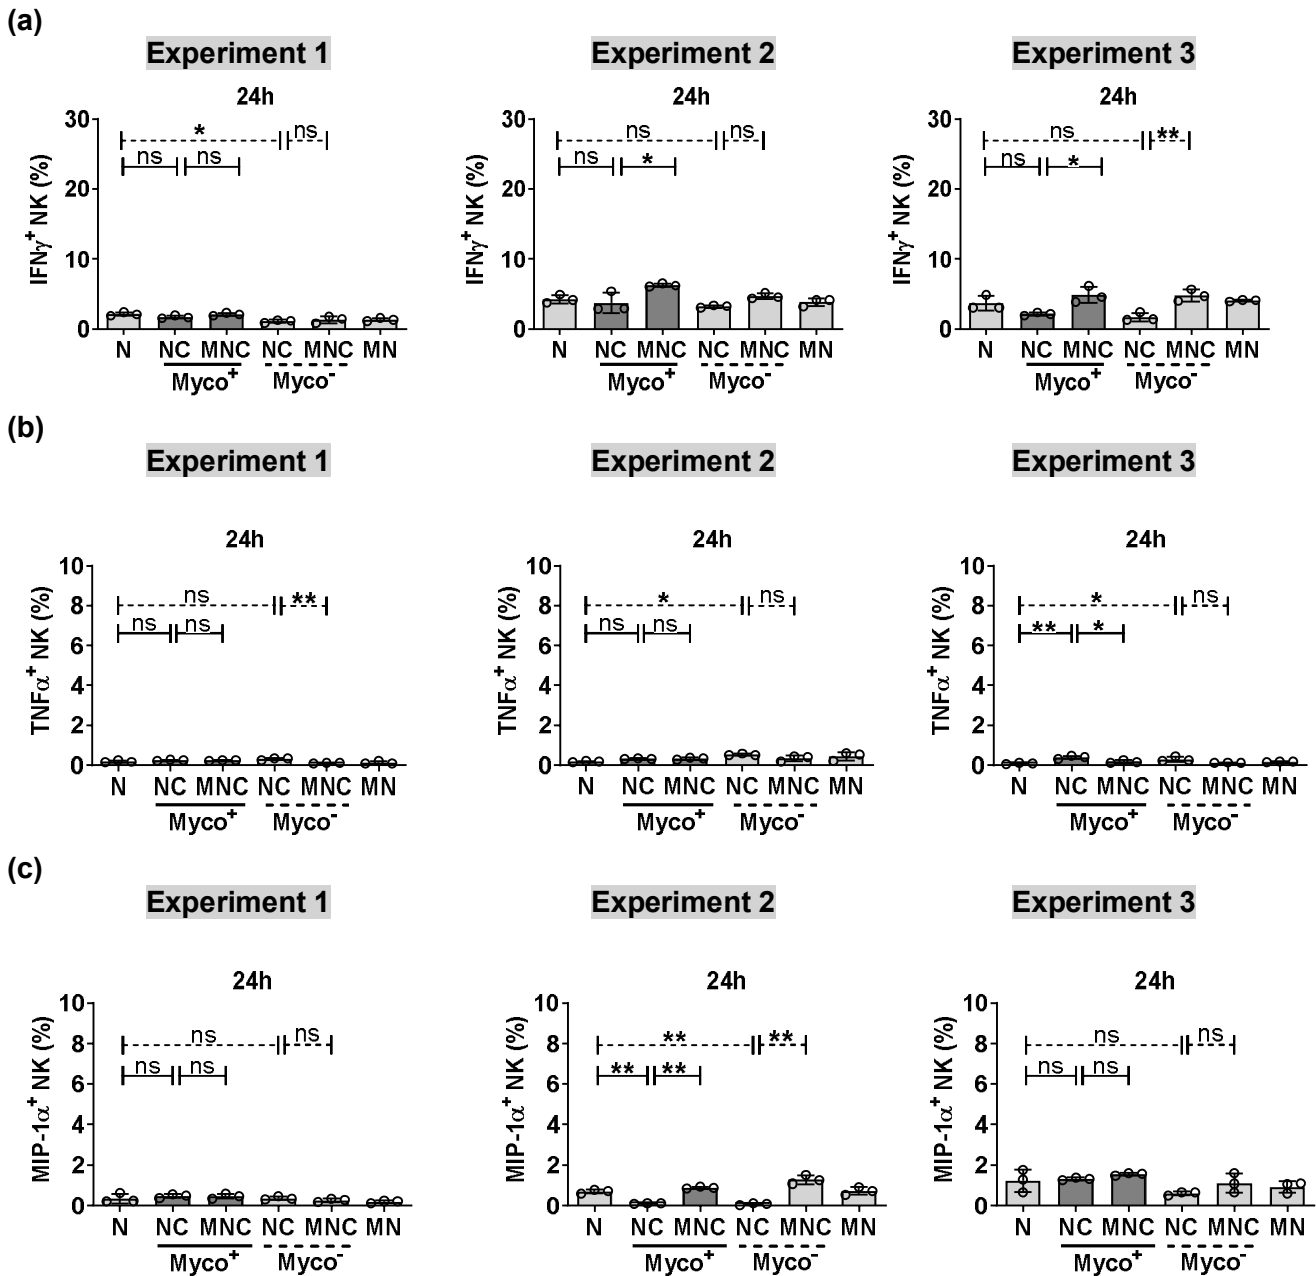

**Supplementary figure 12. No significant changes in IFN $\gamma$ , TNF $\alpha$  and MIP-1 $\alpha$  production in NK upon duo- or trio-culture with M $\phi$  and CML cells.** NK, M $\phi$ , and myco<sup>-</sup> and myco<sup>+</sup> CML were incubated in mono-, duo- and trio-cultures for 24 hours. Brefeldin was added at the last 4 hours of the co-cultures to ensure that cytokines were retained in the NK for intracellular cytokine staining of (a) IFN $\gamma$ , (b) TNF $\alpha$  and (c) MIP-1 $\alpha$ . Data from each experiment are presented as mean  $\pm$  s.d. from 3 replicate cultures. 3 independent experiments, each from different donors are shown. Statistical significance was determined using 1-way ANOVA corrected with Bonferroni's Multiple Comparison Test. \*  $P < 0.05$ ; \*\*  $P < 0.01$ ; ns nonsignificant. N, NK alone; NC, NK+CML; MNC, M $\phi$ +NK+CML; MN, M $\phi$ +NK.

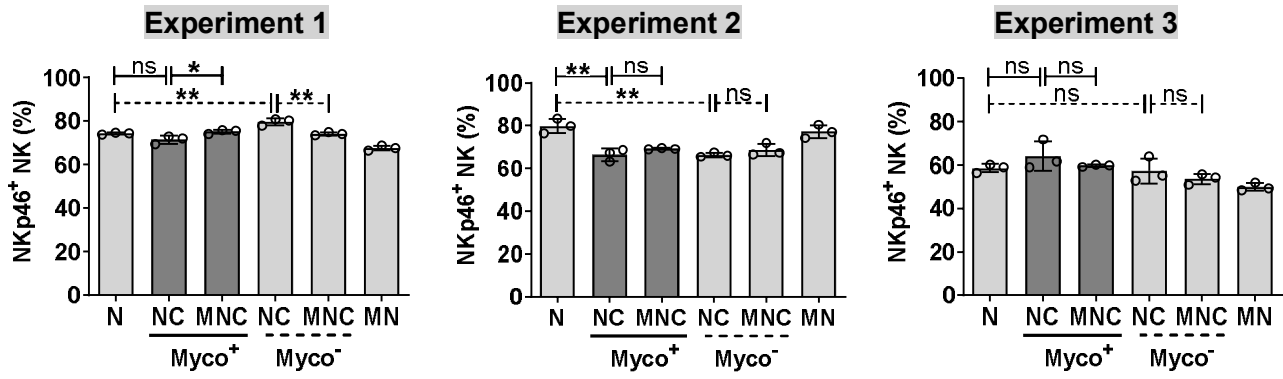

**Supplementary figure 13. Marginal changes in the level of activating receptor NKp46 on NK upon co-culture with M $\phi$  and CML.** NK, M $\phi$ , and myco<sup>-</sup> and myco<sup>+</sup> CML were incubated in mono-, duo- and trio-cultures. CFSE<sup>-</sup>CD14<sup>-</sup>CD56<sup>+</sup> NK cells were gated. NKp46 activating receptors level was measured on NK upon co-culture with M $\phi$  and CML. Data from each experiment are presented as mean  $\pm$  s.d. from 3 replicate cultures. 3 independent experiments, each from different donors are shown. Statistical significance was determined using 1-way ANOVA corrected with Bonferroni's Multiple Comparison Test. \*  $P < 0.05$ ; \*\*  $P < 0.01$ ; ns nonsignificant. N, NK alone; NC, NK+CML; MNC, M $\phi$ +NK+CML; MN, M $\phi$ +NK.

## Experiment 1

(a)

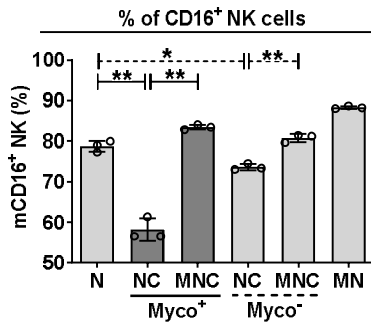

(b)

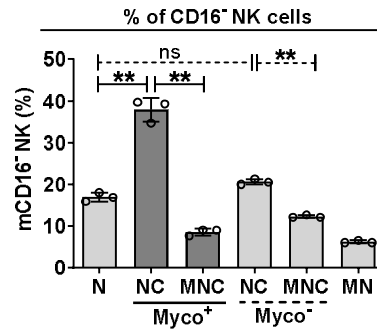

(c)

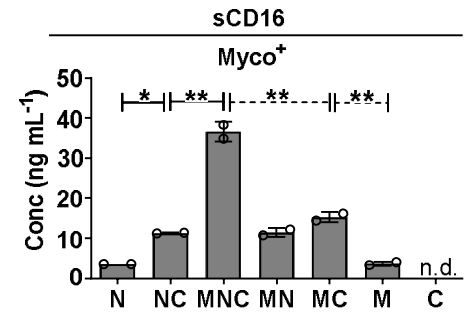

## Experiment 2

(a)

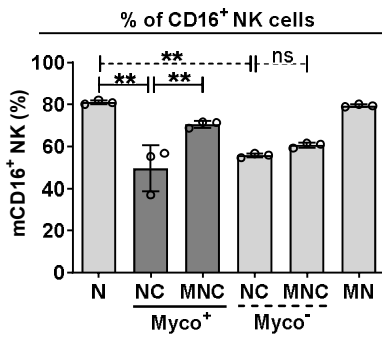

(b)

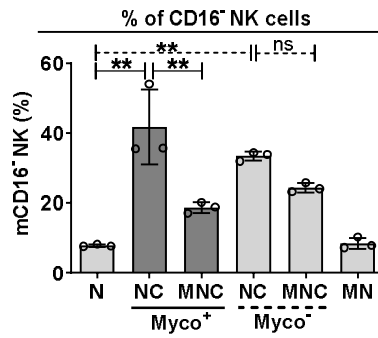

(c)

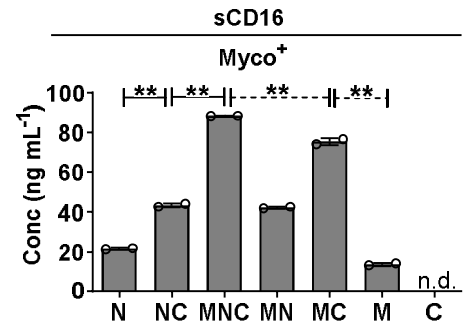

## Experiment 3

(a)

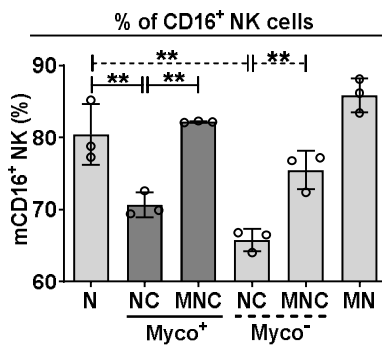

(b)

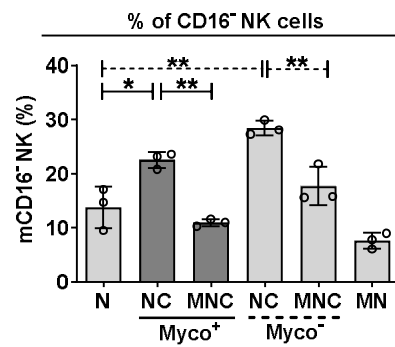

(c)

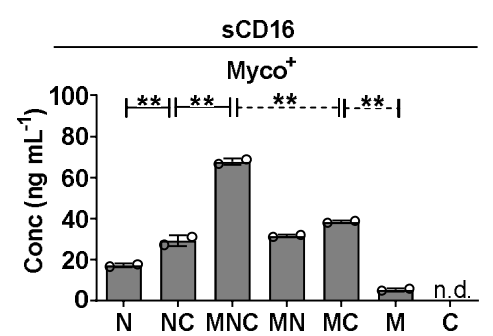

## Experiment 4

(a)

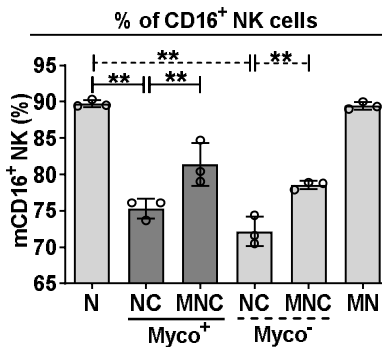

(b)

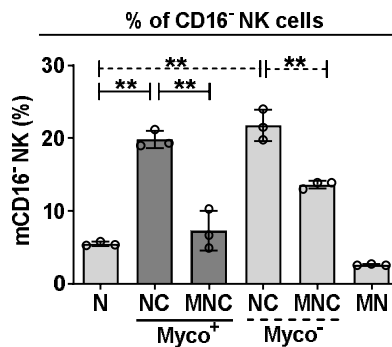

**Supplementary figure 14, related to Figure 5. NK mCD16 level is maintained in vitro in MNC trio-culture under infection-inflammation condition of CML cells.**

(a-b) NK, M $\phi$ , and myco<sup>-</sup>/myco<sup>+</sup> CML were incubated in mono-, duo- and trio-cultures. CFSE<sup>-</sup>CD14<sup>-</sup>CD56<sup>+</sup> NK cells were gated. % of (a) CD16<sup>+</sup> and (b) CD16<sup>-</sup> NK were determined on NK upon co-culture with M $\phi$  and CML. NK mCD16 level was determined specifically on CD56<sup>dim</sup> NK, which is the cytotoxic counterpart of the NK population. (c) NK, M $\phi$ , and myco<sup>-</sup> and myco<sup>+</sup> CML were incubated in mono-, duo- and trio-cultures. Culture supernatants were collected and measured for concentration (conc) of soluble CD16 (sCD16) using ELISA. Data from each experiment are presented as mean  $\pm$  s.d. from 2-3 replicate cultures. 4 independent experiments (a, b) or 3 independent experiments (c), each from different donors are shown. Statistical significance was determined using 1-way ANOVA corrected with Bonferroni's Multiple Comparison Test. \* P < 0.05; \*\* P < 0.01; ns, non-significant.

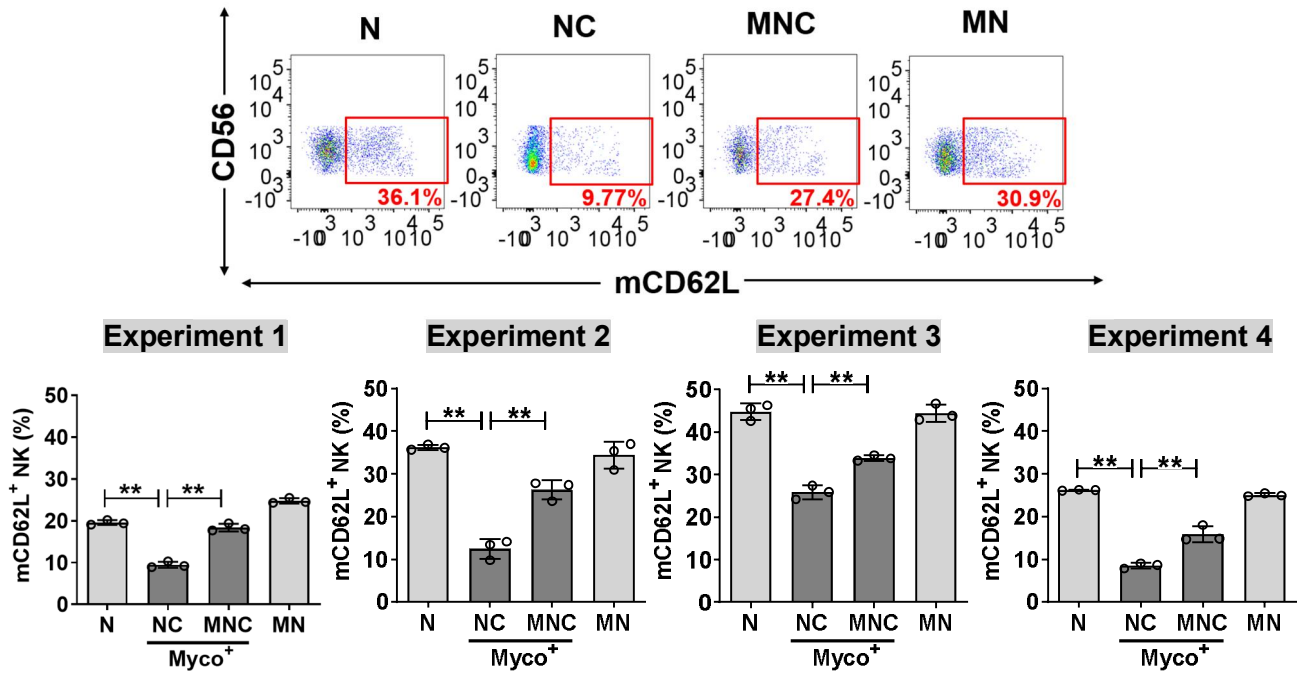

**Supplementary figure 15. Attenuation of sheddase activity in MNC trio-cultures under myco<sup>+</sup> condition.** NK, M $\phi$ , and myco<sup>+</sup> CML were incubated in mono-, duo- and trio-cultures. NK was gated in flow cytometry as CFSE<sup>-</sup>CD14<sup>-</sup>CD56<sup>+</sup>. NK mCD62L level was determined specifically on CD56<sup>dim</sup> NK, which is the cytotoxic counterpart of the NK population, as indicated in red on the representative flow cytometry dot-plots. Data on percentage of mCD62L<sup>+</sup> NK in each experiment are presented as mean  $\pm$  s.d. from 3 replicate cultures. 4 independent experiments, each from different donors are shown. Statistical significance was determined using 1-way ANOVA corrected with Bonferroni's Multiple Comparison Test. \* $P < 0.05$ ; \*\* $P < 0.01$ ; ns nonsignificant. N, NK alone; NC, NK+CML; MNC, M $\phi$ +NK+CML; MN, M $\phi$ +NK.

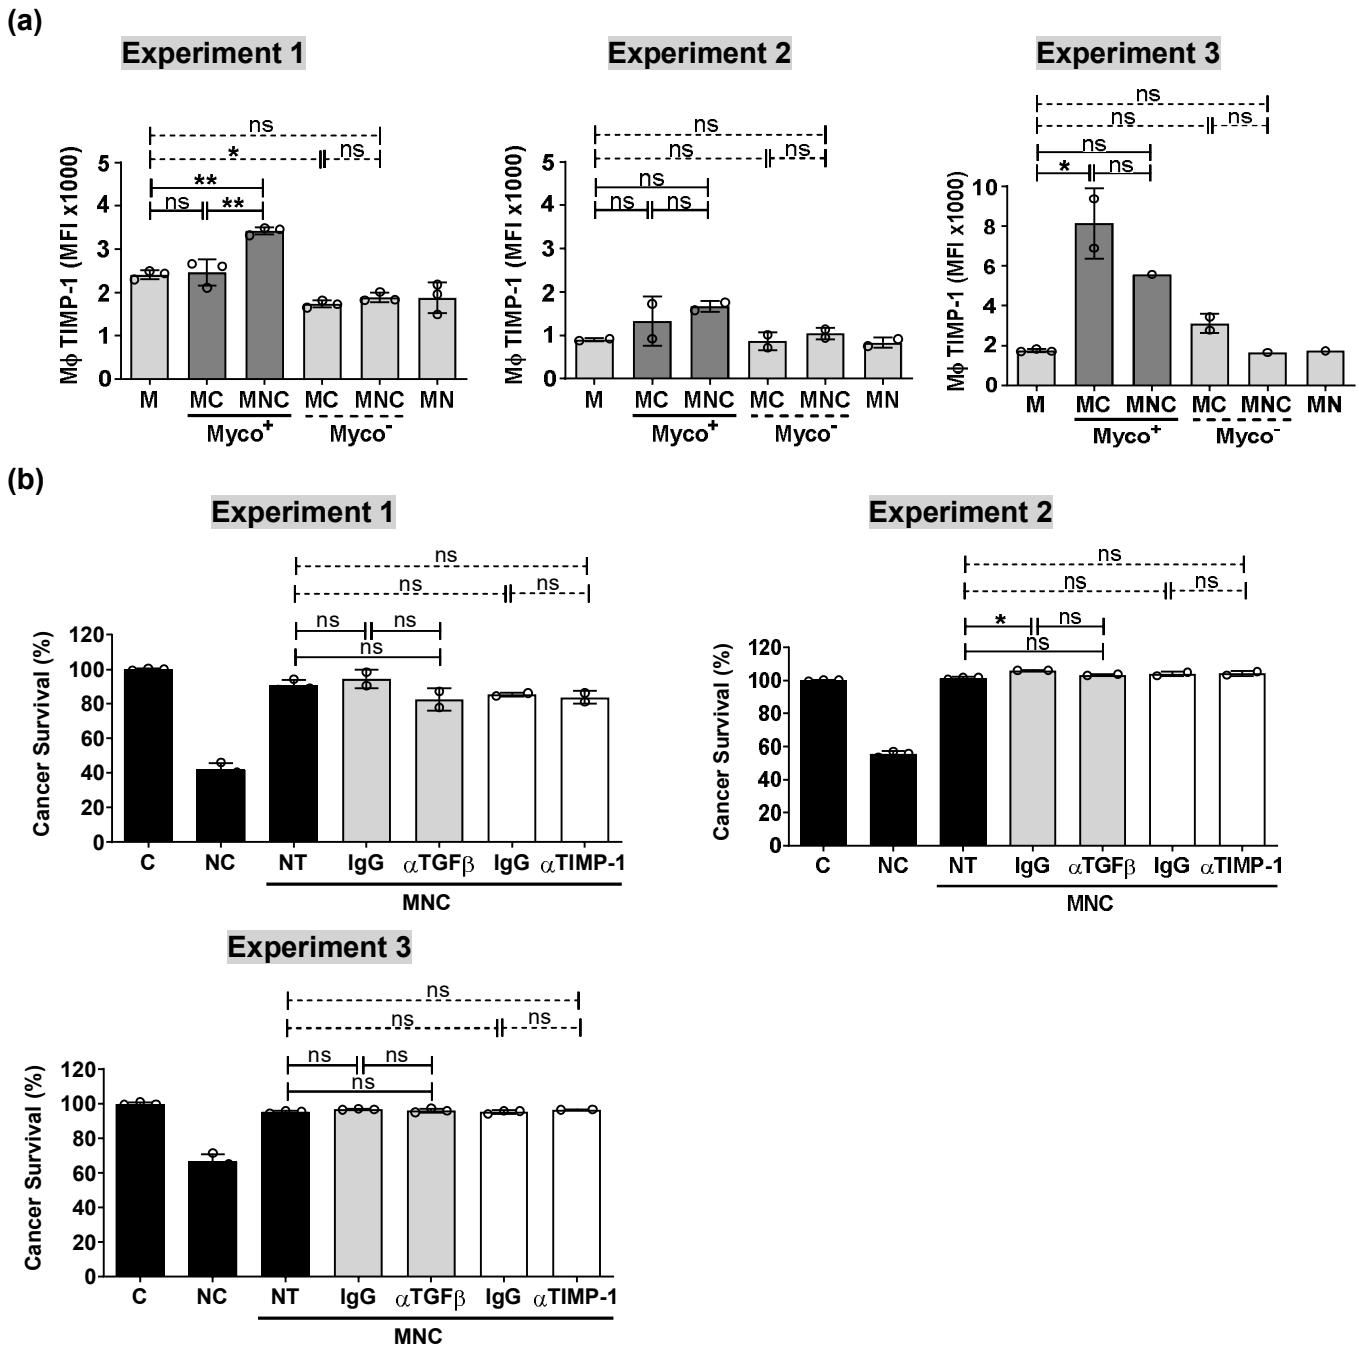

**Supplementary figure 16. TIMP-sheddase modulation does not influence CML survival in MNC trio-culture.** (a) Intracellular TIMP-1 expression in M $\phi$  were measured under mono, duo- and trio-cultures. CFSE<sup>-</sup>CD14<sup>+</sup> M $\phi$  were gated in flow cytometry. (b) MNC trio-cultures were treated with neutralising antibodies against TGF $\beta$  or TIMP-1 and equal amount of IgG isotype control. The treated samples were then measured for CML survival based on negative staining for FVD and normalised to cancer alone control. Data from each experiment are presented as mean  $\pm$  s.d. from 1-3 replicate cultures. 3 independent experiments, each from different donors are shown. Statistical significance was determined using 1-way ANOVA corrected with Bonferroni's Multiple Comparison Test. \*  $P < 0.05$ ; \*\*  $P < 0.01$ ; ns nonsignificant. M $\phi$ , macrophage alone; N, NK alone; C, CML alone; NC, NK+CML; MNC, M $\phi$ +NK+CML; MN, M $\phi$ +NK; NT, non-treated with neutralising antibody; IgG, IgG isotype control.



## Experiment 1

### Co-cultures with myco<sup>+</sup> CML

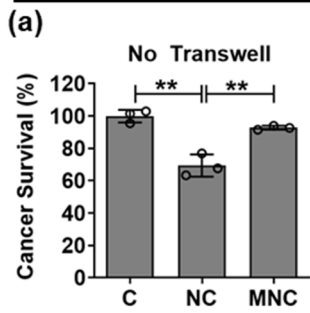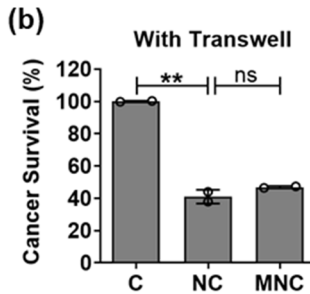

### Co-cultures with myco<sup>-</sup> CML

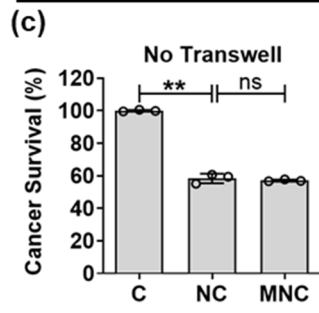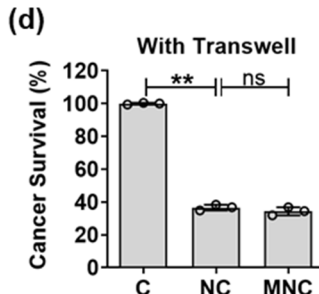

### Co-cultures with myco<sup>+</sup> or myco<sup>-</sup> CML

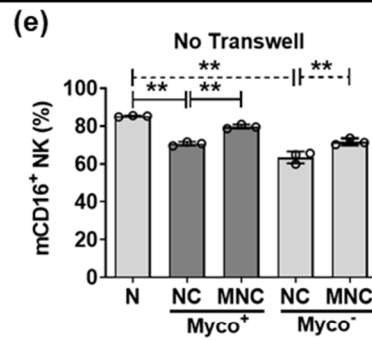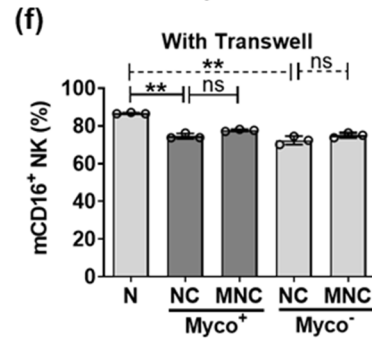

## Experiment 2

### Co-cultures with myco<sup>+</sup> CML

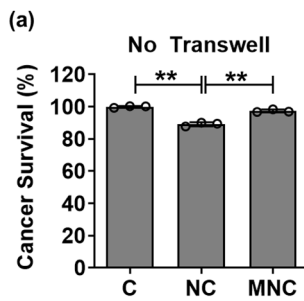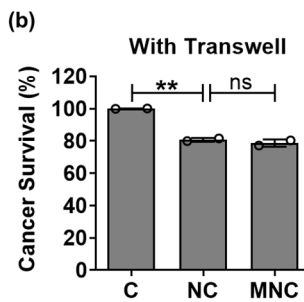

### Co-cultures with myco<sup>-</sup> CML

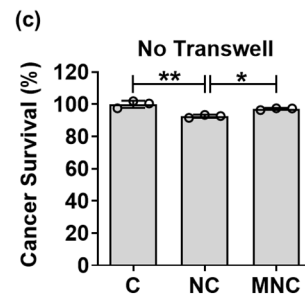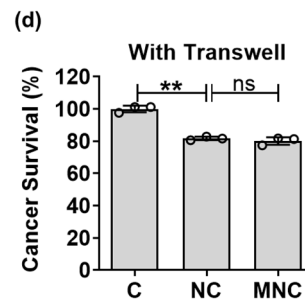

### Co-cultures with myco<sup>+</sup> or myco<sup>-</sup> CML

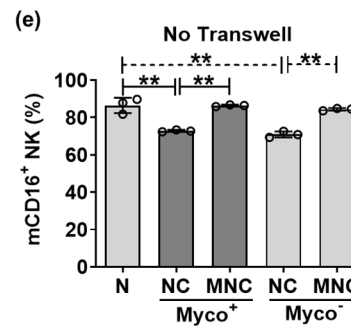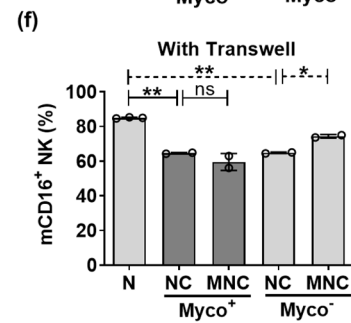

### Experiment 3

#### Co-cultures with myco<sup>+</sup> CML

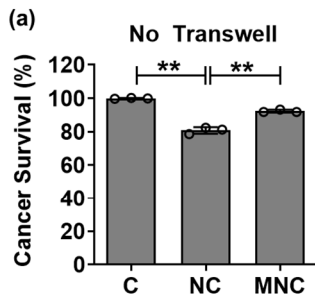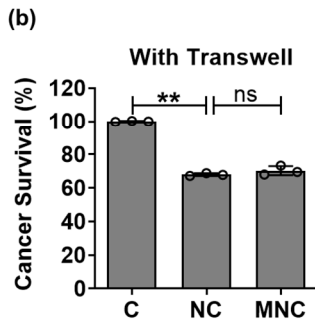

#### Co-cultures with myco<sup>-</sup> CML

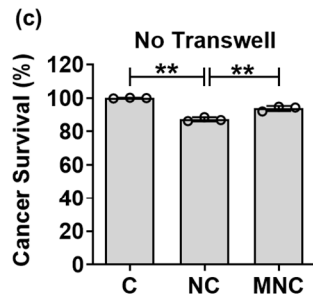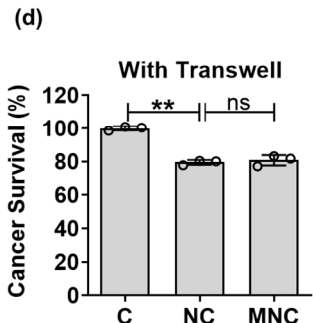

#### Co-cultures with myco<sup>+</sup> or myco<sup>-</sup> CML

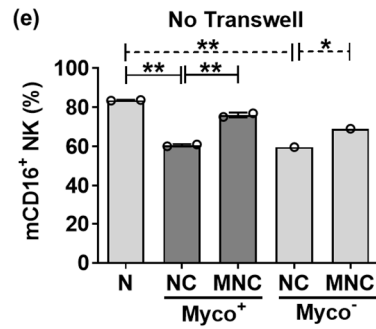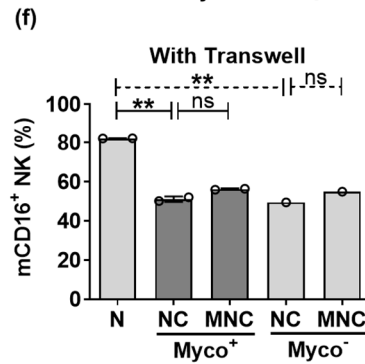

### Experiment 4

#### Co-cultures with myco<sup>-</sup> CML

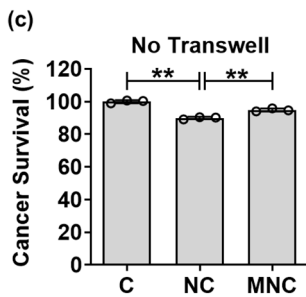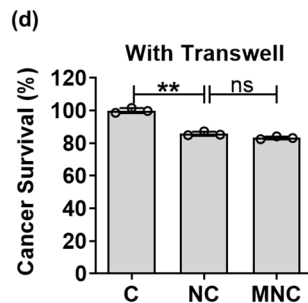

**Supplementary figure 17, related to Figure 6. Mφ protection of CML from NK cytotoxicity was abrogated when cell-cell contact interactions were disrupted.**

(a, b) Mφ, NK cells and myco<sup>+</sup> CML cells were co-cultured in the presence and absence of transwell for 24h. CML survival was then assessed based on negative staining for viability dye and normalising to cancer alone control. Results shown are representative of 3 independent experiments (donors). Data in are presented as mean ± s.d. of 2-3 replicate cultures. (c, d) Mφ, NK cells and myco<sup>-</sup> CML were assessed as described in (a, b). (e, f) Mφ, NK cells and myco<sup>+</sup> or myco<sup>-</sup> CML were co-cultured in the presence and absence of transwell for 24h and then assessed for percentage mCD16<sup>+</sup> NK cells by flow cytometry. Data from each experiment are presented as mean ± s.d. from 1-3 replicate cultures. 3 independent experiments (a, b, e and f) or 4 independent experiments (c, d), each from different donors are shown. Statistical significance was determined using 1-way ANOVA corrected with Bonferroni's Multiple Comparison Test. \* P < 0.05; \*\* P < 0.01; ns, non-significant.

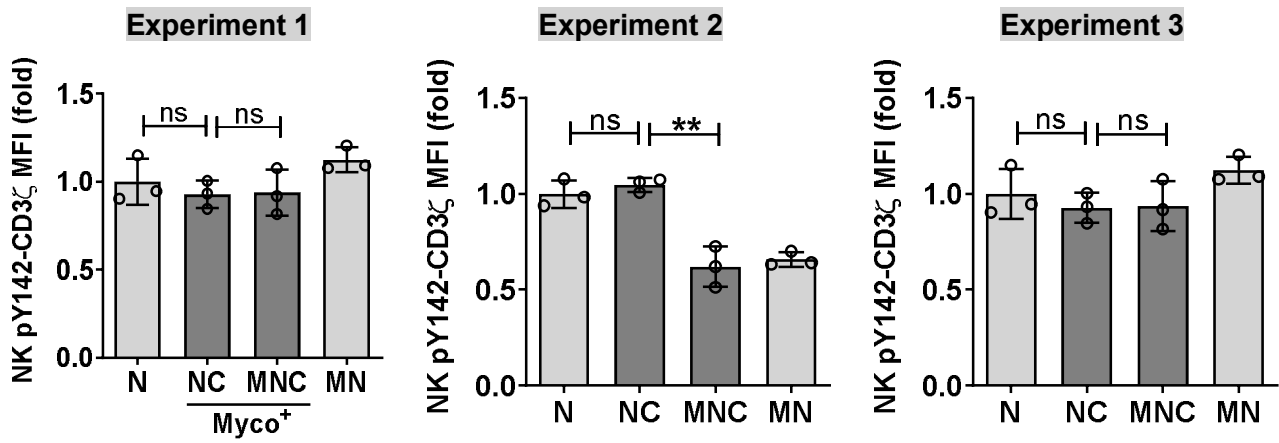

**Supplementary figure 18. No significant changes in NK phosphorylated CD3 $\zeta$  level.** NK, M $\phi$ , and myco<sup>+</sup> CML were incubated in mono-, duo- and trio-cultures. Cells were immediately fixed and permeabilised to capture the level of CD3 $\zeta$  phosphorylation at tyrosine residue 142 at the end of co-cultures. NK was gated in flow cytometry as CFSE<sup>-</sup>CD14<sup>+</sup>. Data from each experiment are presented as mean  $\pm$  s.d. from 3 replicate cultures. 3 independent experiments, each from different donors are shown. Statistical significance was determined using 1-way ANOVA corrected with Bonferroni's Multiple Comparison Test. \*  $P < 0.05$ ; \*\*  $P < 0.01$ ; ns nonsignificant. N, NK alone; NC, NK+CML; MNC, M $\phi$ +NK+CML; MN, M $\phi$ +NK.
